# Supplementary material for: Environmental sampling to assess the bioburden of Mycobacterium avium subspecies paratuberculosis in drylot pens on California dairies
Source: PeerJ. 2019 Nov 19;7:e8081. doi: 10.7717/peerj.8081 (PMC6873878; doi:10.7717/peerj.8081)
Supplement: Supplemental Information 2 [file peerj-07-8081-s002.xlsx]

## Sheet: Sheet1
Index	Herd	CowID	Pen	CT	Control	Results	Finalresults	Weight	Cow/Pen
1	2	46636	1	40	32.28	Neg	0	13.5122	221
2	2	39777	1	40	31.27	Neg	0	13.5122	221
3	2	44079	1	40	31.73	Neg	0	13.5122	221
4	2	44143	1	40	31.63	Neg	0	13.5122	221
5	2	44308	1	40	32.27	Neg	0	13.5122	221
6	2	39252	1	40	31.99	Neg	0	1	221
7	2	39587	1	40	32.34	Neg	0	13.5122	221
8	2	44144	1	40	31.1	Neg	0	13.5122	221
9	2	9292	1	40	32.02	Neg	0	1	221
10	2	43531	1	40	32.48	Neg	0	13.5122	221
11	2	22525	1	37.92	31.6	Pos	1	1	221
12	2	42152	1	40	31.52	Neg	0	13.5122	221
13	2	42872	1	40	31.38	Neg	0	1	221
14	2	43946	1	30.26	30.79	Pos	1	1	221
15	2	46294	1	40	31.06	Neg	0	13.5122	221
16	2	43540	1	40	31.37	Neg	0	13.5122	221
17	2	46369	1	40	31.14	Neg	0	13.5122	221
18	2	47091	1	40	31.2	Neg	0	13.5122	221
19	2	47077	1	40	30.78	Neg	0	13.5122	221
20	2	44360	1	40	30.77	Neg	0	13.5122	221
21	2	47084	1	40	30.65	Neg	0	13.5122	221
22	2	45015	3	40	30.65	Neg	0	13.5122	320
23	2	19874	3	29.31	31.36	Pos	1	1	320
24	2	35602	3	40	31.19	Neg	0	1	320
25	2	46072	3	40	32.19	Neg	0	13.5122	320
26	2	40960	3	40	31.12	Neg	0	13.5122	320
27	2	46224	3	40	31.53	Neg	0	13.5122	320
28	2	2843	3	34.46	30.73	Pos	1	1	320
29	2	46354	3	40	31.34	Neg	0	13.5122	320
30	2	46093	3	40	31.28	Neg	0	13.5122	320
31	2	46103	3	40	31.24	Neg	0	13.5122	320
32	2	42993	3	40	31.41	Neg	0	13.5122	320
33	2	2850	3	33.07	31.5	Pos	1	1	320
34	2	2165	3	38.17	30.72	Neg	0	1	320
35	2	40451	3	40	32.41	Neg	0	13.5122	320
36	2	40975	2	40	32.27	Neg	0	13.5122	31
37	2	43165	3	40	31.62	Neg	0	1	320
38	2	21328	3	40	31.28	Neg	0	1	320
39	2	45858	3	40	31.52	Neg	0	13.5122	320
40	2	6226	3	35.32	31.63	Pos	1	1	320
41	2	45970	3	40	31.13	Neg	0	13.5122	320
42	2	19822	3	27.3	31.21	Pos	1	1	320
43	2	19903	3	37.99	32.2	Pos	1	1	320
44	2	18341	3	33.84	31.5	Pos	1	1	320
45	2	45942	3	40	31.36	Neg	0	13.5122	320
46	2	39791	3	40	31.12	Neg	0	13.5122	320
47	2	40849	3	40	31.53	Neg	0	1	320
48	2	22280	3	40	31.2	Neg	0	1	320
49	2	42894	2	40	31.31	Neg	0	13.5122	31
50	2	45888	3	40	31.39	Neg	0	13.5122	320
51	2	41207	3	40	30.82	Neg	0	13.5122	320
52	2	45987	3	40	30.61	Neg	0	13.5122	320
53	2	44245	3	40	30.62	Neg	0	13.5122	320
54	2	45717	3	40	31.12	Neg	0	13.5122	320
55	2	44702	3	40	31.31	Neg	0	13.5122	320
56	2	45547	3	40	31.08	Neg	0	13.5122	320
57	2	43248	3	40	31.87	Neg	0	13.5122	320
58	2	45529	3	40	32.84	Neg	0	13.5122	320
59	2	43343	3	40	32.33	Neg	0	13.5122	320
60	1	48464	2	40	31.61	Neg	0	1	260
61	1	47530	2	40	31.36	Neg	0	9.19298	260
62	1	44116	2	40	31.56	Neg	0	9.19298	260
63	1	47553	2	40	31.79	Neg	0	1	260
64	1	47878	2	40	31.77	Neg	0	9.19298	260
65	1	46758	2	40	31.16	Neg	0	1	260
66	1	47503	2	40	31.12	Neg	0	9.19298	260
67	1	45105	2	40	30.97	Neg	0	9.19298	260
68	1	47785	2	40	31.64	Neg	0	9.19298	260
69	1	48025	2	40	31.79	Neg	0	9.19298	260
70	1	49218	2	40	30.92	Neg	0	9.19298	260
71	1	49980	2	40	31.43	Neg	0	9.19298	260
72	1	48242	2	40	32.09	Neg	0	9.19298	260
73	1	46512	2	40	31.36	Neg	0	9.19298	260
74	1	49356	2	40	30.77	Neg	0	9.19298	260
75	1	49358	2	40	32.34	Neg	0	9.19298	260
76	1	47849	2	40	30.86	Neg	0	9.19298	260
77	1	47153	2	40	31.2	Neg	0	9.19298	260
78	1	45303	2	40	30.53	Neg	0	9.19298	260
79	1	44755	2	40	31.16	Neg	0	9.19298	260
80	1	46387	2	40	31.98	Neg	0	9.19298	260
81	1	44104	2	40	31.16	Neg	0	9.19298	260
82	1	47668	2	40	31.22	Neg	0	9.19298	260
83	1	44280	2	40	30.82	Neg	0	9.19298	260
84	1	47216	2	40	31.48	Neg	0	1	260
85	1	47780	2	40	31.1	Neg	0	9.19298	260
86	1	49441	2	40	31.18	Neg	0	9.19298	260
87	1	47050	2	40	32.08	Neg	0	9.19298	260
88	1	47921	2	40	31.31	Neg	0	9.19298	260
89	1	47586	2	40	30.74	Neg	0	9.19298	260
90	1	47392	2	36.34	31.36	Pos	1	9.19298	260
91	1	42926	3	40	31	Neg	0	9.19298	103
92	1	44864	3	40	31.75	Neg	0	1	103
93	1	40453	3	40	31.37	Neg	0	1	103
94	1	38392	3	40	31.27	Neg	0	1	103
95	1	46740	3	38.33	30.95	Neg	0	9.19298	103
96	1	27176	3	27.03	31.63	Pos	1	1	103
97	1	32987	3	30.93	31.67	Pos	1	1	103
98	1	47338	3	36.89	31.09	Pos	1	9.19298	103
99	1	39309	3	40	31.47	Neg	0	1	103
100	1	39568	3	40	31.5	Neg	0	9.19298	103
101	1	47825	3	40	31.2	Neg	0	1	103
102	1	40441	3	40	31.53	Neg	0	1	103
103	1	40775	3	40	30.9	Neg	0	1	103
104	1	41046	3	40	31.47	Neg	0	1	103
105	1	20709	3	31.88	30.94	Pos	1	1	103
106	1	39111	3	40	31.11	Neg	0	1	103
107	1	43856	3	36.52	31.49	Pos	1	9.19298	103
108	1	39123	3	40	31.07	Neg	0	1	103
109	1	44853	3	37.37	31.53	Pos	1	1	103
110	1	30405	3	40	30.98	Neg	0	9.19298	103
111	1	43384	3	37.44	31.05	Pos	1	1	103
112	1	32737	3	40	31.87	Neg	0	9.19298	103
113	1	34276	3	34.66	31.17	Pos	1	1	103
114	1	37920	3	40	31.25	Neg	0	1	103
115	1	32845	3	40	31.52	Neg	0	9.19298	103
116	1	45496	3	40	32.13	Neg	0	1	103
117	1	31651	3	40	31.37	Neg	0	9.19298	103
118	1	27756	3	40	31.33	Neg	0	1	103
119	1	50518	3	40	31.59	Neg	0	9.19298	103
120	1	44767	3	40	31.78	Neg	0	1	103
121	1	44526	3	40	31.63	Neg	0	1	103
122	1	44901	3	40	31.12	Neg	0	1	103
123	1	41251	3	39.3	31.65	Neg	0	1	103
124	1	40025	3	40	32.69	Neg	0	1	103
125	1	44869	1	40	31.91	Neg	0	9.19298	193
126	1	48897	1	40	30.98	Neg	0	9.19298	193
127	1	45128	1	40	30.75	Neg	0	9.19298	193
128	1	48422	1	40	31.59	Neg	0	1	193
129	1	42917	1	40	32.53	Neg	0	9.19298	193
130	1	44624	1	40	31.76	Neg	0	9.19298	193
131	1	44684	1	40	31.38	Neg	0	9.19298	193
132	1	44605	1	40	31.38	Neg	0	9.19298	193
133	1	45843	1	40	32.23	Neg	0	9.19298	193
134	1	43651	1	40	31.82	Neg	0	9.19298	193
135	1	48048	1	40	31.53	Neg	0	1	193
136	1	44705	1	40	31.43	Neg	0	9.19298	193
137	1	47350	1	40	31.83	Neg	0	9.19298	193
138	1	44630	1	40	31.48	Neg	0	9.19298	193
139	1	48119	1	40	31.49	Neg	0	9.19298	193
140	1	42465	1	40	31.07	Neg	0	9.19298	193
141	1	47998	1	40	31.42	Neg	0	1	193
142	1	45170	1	40	31.47	Neg	0	9.19298	193
143	1	45789	1	40	31.47	Neg	0	9.19298	193
144	1	45734	1	40	31.63	Neg	0	9.19298	193
145	1	45844	1	40	31.25	Neg	0	9.19298	193
146	1	45037	1	40	31.2	Neg	0	9.19298	193
147	1	48980	1	40	31.63	Neg	0	9.19298	193
148	1	45751	1	40	32.42	Neg	0	1	193
