# Supplementary material for: Environmental sampling to assess the bioburden of Mycobacterium avium subspecies paratuberculosis in drylot pens on California dairies
Source: PeerJ. 2019 Nov 19;7:e8081. doi: 10.7717/peerj.8081 (PMC6873878; doi:10.7717/peerj.8081)
Supplement: Supplemental Information 3 [file peerj-07-8081-s003.xlsx]

## Sheet: Sheet1
Sample ID	Herd	Cow ID	Breed	Pen Number	S/P	ResultsCheck	Retested_122117	SP_122117	Result_122117	Restested 010318	SP_010318	Result_010318	SP_010818	Result_010818	FinalELISASP	FinalELISARESULT
1	1	45232	Jersey	2	0.065	Negative			Negative						0.065	Negative
2	1	44567	Jersey	2	0.006	Negative			Negative						0.006	Negative
3	1	45377	Jersey	2	0.032	Negative			Negative						0.032	Negative
4	1	41913	Jersey	2	0.017	Negative			Negative						0.017	Negative
5	1	44179	Jersey	2	0.02	Negative			Negative						0.02	Negative
6	1	44977	Jersey	2	0.024	Negative			Negative						0.024	Negative
7	1	49481	Jersey	2	0.064	Negative			Negative						0.064	Negative
8	1	41212	Jersey	2	0.025	Negative			Negative						0.025	Negative
9	1	46276	Jersey	2	0.052	Negative			Negative						0.052	Negative
10	1	47203	Jersey	2	0.02	Negative			Negative						0.02	Negative
11	1	48464	Jersey	2	1.206	Positive	1	1.51	Positive						1.51	Positive
12	1	45109	Jersey	2	0.224	Negative			Negative						0.224	Negative
13	1	48438	Jersey	2	0.277	Negative			Negative						0.277	Negative
14	1	47530	Jersey	2	0.032	Negative			Negative						0.032	Negative
15	1	46416	Jersey	2	0.152	Negative			Negative						0.152	Negative
16	1	45912	Jersey	2	0.01	Negative			Negative						0.01	Negative
17	1	47168	Jersey	2	0.101	Negative			Negative						0.101	Negative
18	1	46305	Jersey	2	0.02	Negative			Negative						0.02	Negative
19	1	44354	Jersey	2	0.028	Negative			Negative						0.028	Negative
20	1	44917	Jersey	2	0.017	Negative			Negative						0.017	Negative
21	1	48156	Jersey	2	0.052	Negative			Negative						0.052	Negative
22	1	44116	Jersey	2	0.017	Negative			Negative						0.017	Negative
23	1	48134	Jersey	2	0.011	Negative			Negative						0.011	Negative
24	1	45408	Jersey	2	0.064	Negative			Negative						0.064	Negative
25	1	47716	Jersey	2	0.025	Negative			Negative						0.025	Negative
26	1	45212	Jersey	2	0.024	Negative			Negative						0.024	Negative
27	1	47894	Jersey	2	0.01	Negative			Negative						0.01	Negative
28	1	44936	Jersey	2	0.02	Negative			Negative						0.02	Negative
29	1	47553	Jersey	2	0.489	Suspect			Negative	1	0.536				0.536	Suspect
30	1	44118	Jersey	2	0.025	Negative			Negative						0.025	Negative
31	1	47878	Jersey	2	0.016	Negative			Negative						0.016	Negative
32	1	46758	Jersey	2	0.472	Suspect			Negative	1	0.551				0.551	Positive
33	1	47503	Jersey	2	0.012	Negative			Negative						0.012	Negative
34	1	45105	Jersey	2	0.024	Negative			Negative						0.024	Negative
35	1	46520	Jersey	2	0.016	Negative			Negative						0.016	Negative
36	1	47792	Jersey	2	0.006	Negative			Negative						0.006	Negative
37	1	47757	Jersey	2	0.02	Negative			Negative						0.02	Negative
38	1	43421	Jersey	2	0.014	Negative			Negative						0.014	Negative
39	1	46965	Jersey	2	0.025	Negative			Negative						0.025	Negative
40	1	48495	Jersey	2	0.202	Negative			Negative						0.202	Negative
41	1	45615	Jersey	2	0.017	Negative			Negative						0.017	Negative
42	1	46469	Jersey	2	0.017	Negative			Negative						0.017	Negative
43	1	46858	Jersey	2	0.016	Negative			Negative						0.016	Negative
44	1	47806	Jersey	2	0.343	Negative			Negative						0.343	Negative
45	1	45041	Jersey	2	0.017	Negative			Negative						0.017	Negative
46	1	45740	Jersey	2	0.039	Negative			Negative						0.039	Negative
47	1	44987	Jersey	2	0.057	Negative			Negative						0.057	Negative
48	1	48363	Jersey	2	0.002	Negative			Negative						0.002	Negative
49	1	49791	Jersey	2	0.036	Negative			Negative						0.036	Negative
50	1	45923	Jersey	2	0.105	Negative			Negative						0.105	Negative
51	1	47785	Jersey	2	0.029	Negative			Negative						0.029	Negative
52	1	42084	Jersey	2	0.004	Negative			Negative						0.004	Negative
53	1	47816	Jersey	2	0.034	Negative			Negative						0.034	Negative
54	1	44470	Jersey	2	0.055	Negative			Negative						0.055	Negative
55	1	44512	Jersey	2	0.023	Negative			Negative						0.023	Negative
56	1	46868	Jersey	2	0.201	Negative			Negative						0.201	Negative
57	1	46139	Jersey	2	0.219	Negative			Negative						0.219	Negative
58	1	48293	Jersey	2	0.016	Negative			Negative						0.016	Negative
59	1	48139	Jersey	2	0.012	Negative			Negative						0.012	Negative
60	1	47514	Jersey	2	0.014	Negative			Negative						0.014	Negative
61	1	48025	Jersey	2	0.012	Negative			Negative						0.012	Negative
62	1	47678	Jersey	2	0.07	Negative			Negative						0.07	Negative
63	1	42359	Jersey	2	0.039	Negative			Negative						0.039	Negative
64	1	48016	Jersey	2	0.004	Negative			Negative						0.004	Negative
65	1	47937	Jersey	2	0	Negative			Negative						0	Negative
66	1	46735	Jersey	2	0.126	Negative			Negative						0.126	Negative
67	1	47044	Jersey	2	0.008	Negative			Negative						0.008	Negative
68	1	47709	Jersey	2	0.025	Negative			Negative						0.025	Negative
69	1	45840	Jersey	2	0.019	Negative			Negative						0.019	Negative
70	1	47858	Jersey	2	0.107	Negative			Negative						0.107	Negative
71	1	49144	Jersey	2	0.075	Negative			Negative						0.075	Negative
72	1	47073	Jersey	2	0.012	Negative			Negative						0.012	Negative
73	1	47281	Jersey	2	0.004	Negative			Negative						0.004	Negative
74	1	49218	Jersey	2	0.024	Negative			Negative						0.024	Negative
75	1	44488	Jersey	2	0.054	Negative			Negative						0.054	Negative
76	1	46800	Jersey	2	0.02	Negative			Negative						0.02	Negative
77	1	46634	Jersey	2	0.016	Negative			Negative						0.016	Negative
78	1	41158	Jersey	2	0.014	Negative			Negative						0.014	Negative
79	1	46229	Jersey	2	0.019	Negative			Negative						0.019	Negative
80	1	45602	Jersey	2	0.404	Negative			Negative						0.404	Negative
81	1	46842	Jersey	2	0.049	Negative			Negative						0.049	Negative
82	1	43545	Jersey	2	0.034	Negative			Negative						0.034	Negative
83	1	49980	Jersey	2	0.032	Negative			Negative						0.032	Negative
84	1	49310	Jersey	2	0.016	Negative			Negative						0.016	Negative
85	1	48366	Jersey	2	0.011	Negative			Negative						0.011	Negative
86	1	46878	Jersey	2	0.252	Negative			Negative						0.252	Negative
87	1	47855	Jersey	2	0.148	Negative			Negative						0.148	Negative
88	1	43571	Jersey	2	0.255	Negative			Negative						0.255	Negative
89	1	47862	Jersey	2	0.01	Negative			Negative						0.01	Negative
90	1	47759	Jersey	2	0.017	Negative			Negative						0.017	Negative
91	1	44491	Jersey	2	0.039	Negative			Negative						0.039	Negative
92	1	40712	Jersey	2	0.02	Negative			Negative						0.02	Negative
93	1	48213	Jersey	2	0.189	Negative			Negative						0.189	Negative
94	1	40924	Jersey	2	0.053	Negative			Negative						0.053	Negative
95	1	46476	Jersey	2	0.018	Negative			Negative						0.018	Negative
96	1	46452	Jersey	2	0.019	Negative			Negative						0.019	Negative
97	1	46473	Jersey	2	0.082	Negative			Negative						0.082	Negative
98	1	44995	Jersey	2	0.014	Negative			Negative						0.014	Negative
99	1	43334	Jersey	2	0.131	Negative			Negative						0.131	Negative
100	1	47144	Jersey	2	0.224	Negative			Negative						0.224	Negative
101	1	46785	Jersey	2	0.004	Negative			Negative						0.004	Negative
102	1	49939	Jersey	2	0.007	Negative			Negative						0.007	Negative
103	1	51077	Jersey	2	0.06	Negative			Negative						0.06	Negative
104	1	46951	Jersey	2	0.246	Negative			Negative						0.246	Negative
105	1	46821	Jersey	2	0.021	Negative			Negative						0.021	Negative
106	1	44297	Jersey	2	0.037	Negative			Negative						0.037	Negative
107	1	45855	Jersey	2	0.363	Negative			Negative						0.363	Negative
108	1	48242	Jersey	2	0.011	Negative			Negative						0.011	Negative
109	1	44314	Jersey	2	0.008	Negative			Negative						0.008	Negative
110	1	44159	Jersey	2	0.027	Negative			Negative						0.027	Negative
111	1	46512	Jersey	2	0.026	Negative			Negative						0.026	Negative
112	1	47787	Jersey	2	0.057	Negative			Negative						0.057	Negative
113	1	46429	Jersey	2	0.013	Negative			Negative						0.013	Negative
114	1	44658	Jersey	2	0.008	Negative			Negative						0.008	Negative
115	1	46985	Jersey	2	0.038	Negative			Negative						0.038	Negative
116	1	49356	Jersey	2	0.019	Negative			Negative						0.019	Negative
117	1	48388	Jersey	2	0.009	Negative			Negative						0.009	Negative
118	1	47095	Jersey	2	0.032	Negative			Negative						0.032	Negative
119	1	40592	Jersey	2	0.135	Negative			Negative						0.135	Negative
120	1	48063	Jersey	2	0.019	Negative			Negative						0.019	Negative
121	1	47260	Jersey	2	0.02	Negative			Negative						0.02	Negative
122	1	46379	Jersey	2	0.002	Negative			Negative						0.002	Negative
123	1	48078	Jersey	2	0.043	Negative			Negative						0.043	Negative
124	1	47379	Jersey	2	0.304	Negative			Negative						0.304	Negative
125	1	48403	Jersey	2	0.022	Negative			Negative						0.022	Negative
126	1	44697	Jersey	2	0.361	Negative			Negative						0.361	Negative
127	1	44676	Jersey	2	0.03	Negative			Negative						0.03	Negative
128	1	49358	Jersey	2	0.038	Negative			Negative						0.038	Negative
129	1	48373	Jersey	2	0.043	Negative			Negative						0.043	Negative
130	1	45169	Jersey	2	0.025	Negative			Negative						0.025	Negative
131	1	46186	Jersey	2	0.038	Negative			Negative						0.038	Negative
132	1	45518	Jersey	2	0.006	Negative			Negative						0.006	Negative
133	1	45094	Jersey	2	0.012	Negative			Negative						0.012	Negative
134	1	46252	Jersey	2	0.008	Negative			Negative						0.008	Negative
135	1	48921	Jersey	2	0.019	Negative			Negative						0.019	Negative
136	1	46554	Jersey	2	0.012	Negative			Negative						0.012	Negative
137	1	48090	Jersey	2	0.013	Negative			Negative						0.013	Negative
138	1	45542	Jersey	2	0.044	Negative			Negative						0.044	Negative
139	1	46485	Jersey	2	0.02	Negative			Negative						0.02	Negative
140	1	47849	Jersey	2	0.161	Negative			Negative						0.161	Negative
141	1	44545	Jersey	2	0.259	Negative			Negative						0.259	Negative
142	1	47406	Jersey	2	0.032	Negative			Negative						0.032	Negative
143	1	47153	Jersey	2	0.109	Negative			Negative						0.109	Negative
144	1	40543	Jersey	2	0.362	Negative			Negative						0.362	Negative
145	1	46978	Jersey	2	0.091	Negative			Negative						0.091	Negative
146	1	43635	Jersey	2	0.075	Negative			Negative						0.075	Negative
147	1	48115	Jersey	2	0.032	Negative			Negative						0.032	Negative
148	1	46428	Jersey	2	0.013	Negative			Negative						0.013	Negative
149	1	46560	Jersey	2	0.011	Negative			Negative						0.011	Negative
150	1	48009	Jersey	2	0.021	Negative			Negative						0.021	Negative
151	1	45707	Jersey	2	0.047	Negative			Negative						0.047	Negative
152	1	46564	Jersey	2	0.136	Negative			Negative						0.136	Negative
153	1	45303	Jersey	2	0.176	Negative			Negative						0.176	Negative
154	1	46526	Jersey	2	0.012	Negative			Negative						0.012	Negative
155	1	48960	Jersey	2	0.011	Negative			Negative						0.011	Negative
156	1	46461	Jersey	2	0.011	Negative			Negative						0.011	Negative
157	1	46581	Jersey	2	0.059	Negative			Negative						0.059	Negative
158	1	47615	Jersey	2	0.02	Negative			Negative						0.02	Negative
159	1	44345	Jersey	2	0.296	Negative			Negative						0.296	Negative
160	1	47657	Jersey	2	0.079	Negative			Negative						0.079	Negative
161	1	49406	Jersey	2	0.057	Negative			Negative						0.057	Negative
162	1	44692	Jersey	2	0.389	Negative			Negative						0.389	Negative
163	1	45519	Jersey	2	0.401	Negative			Negative						0.401	Negative
164	1	45334	Jersey	2	0.031	Negative			Negative						0.031	Negative
165	1	46551	Jersey	2	0.006	Negative			Negative						0.006	Negative
166	1	46923	Jersey	2	0.021	Negative			Negative						0.021	Negative
167	1	44503	Jersey	2	0.001	Negative			Negative						0.001	Negative
168	1	47307	Jersey	2	0.2	Negative			Negative						0.2	Negative
169	1	47947	Jersey	2	0.02	Negative			Negative						0.02	Negative
170	1	41190	Jersey	2	0.32	Negative			Negative						0.32	Negative
171	1	47571	Jersey	2	0.247	Negative			Negative						0.247	Negative
172	1	48147	Jersey	2	0.015	Negative			Negative						0.015	Negative
173	1	45426	Jersey	2	0.009	Negative			Negative						0.009	Negative
174	1	43534	Jersey	2	0.013	Negative			Negative						0.013	Negative
175	1	49562	Jersey	2	0.014	Negative			Negative						0.014	Negative
176	1	44841	Jersey	2	0.013	Negative			Negative						0.013	Negative
177	1	44755	Jersey	2	0.041	Negative			Negative						0.041	Negative
178	1	47426	Jersey	2	0.014	Negative			Negative						0.014	Negative
179	1	44629	Jersey	2	0.012	Negative			Negative						0.012	Negative
180	1	45554	Jersey	2	0.034	Negative			Negative						0.034	Negative
181	1	43505	Jersey	2	0.151	Negative			Negative						0.151	Negative
182	1	46387	Jersey	2	0.309	Negative			Negative						0.309	Negative
183	1	44546	Jersey	2	0.027	Negative			Negative						0.027	Negative
184	1	40930	Jersey	2	0.07	Negative			Negative						0.07	Negative
185	1	40902	Jersey	2	0.08	Negative			Negative						0.08	Negative
186	1	47569	Jersey	2	0.028	Negative			Negative						0.028	Negative
187	1	47576	Jersey	2	0.011	Negative			Negative						0.011	Negative
188	1	49196	Jersey	2	0.019	Negative			Negative						0.019	Negative
189	1	44738	Jersey	2	0.359	Negative			Negative						0.359	Negative
190	1	46992	Jersey	2	0.12	Negative			Negative						0.12	Negative
191	1	44104	Jersey	2	0.028	Negative			Negative						0.028	Negative
192	1	42192	Jersey	2	0.151	Negative			Negative						0.151	Negative
193	1	47668	Jersey	2	0.064	Negative			Negative						0.064	Negative
194	1	49473	Jersey	2	0.171	Negative			Negative						0.171	Negative
195	1	46640	Jersey	2	0.012	Negative			Negative						0.012	Negative
196	1	47088	Jersey	2	0.07	Negative			Negative						0.07	Negative
197	1	44280	Jersey	2	0.068	Negative			Negative						0.068	Negative
198	1	46674	Jersey	2	0.032	Negative			Negative						0.032	Negative
199	1	47011	Jersey	2	0.04	Negative			Negative						0.04	Negative
200	1	47216	Jersey	2	0.467	Suspect			Negative	1	0.494				0.494	Suspect
201	1	46079	Jersey	2	0.062	Negative			Negative						0.062	Negative
202	1	45467	Jersey	2	0.157	Negative			Negative						0.157	Negative
203	1	47784	Jersey	2	0.084	Negative			Negative						0.084	Negative
204	1	47162	Jersey	2	0.008	Negative			Negative						0.008	Negative
205	1	47913	Jersey	2	0.05	Negative			Negative						0.05	Negative
206	1	44875	Jersey	2	0.159	Negative			Negative						0.159	Negative
207	1	44889	Jersey	2	0.032	Negative			Negative						0.032	Negative
208	1	48269	Jersey	2	0.05	Negative			Negative						0.05	Negative
209	1	46841	Jersey	2	0.061	Negative			Negative						0.061	Negative
210	1	47843	Jersey	2	0.117	Negative			Negative						0.117	Negative
211	1	46175	Jersey	2	0.048	Negative			Negative						0.048	Negative
212	1	48041	Jersey	2	0.008	Negative			Negative						0.008	Negative
213	1	47865	Jersey	2	0.035	Negative			Negative						0.035	Negative
214	1	43982	Jersey	2	0.022	Negative			Negative						0.022	Negative
215	1	46699	Jersey	2	0.377	Negative			Negative						0.377	Negative
216	1	44931	Jersey	2	0.055	Negative			Negative						0.055	Negative
217	1	48206	Jersey	2	0.065	Negative			Negative						0.065	Negative
218	1	46592	Jersey	2	0.072	Negative			Negative						0.072	Negative
219	1	47478	Jersey	2	0.019	Negative			Negative						0.019	Negative
220	1	44788	Jersey	2	0.035	Negative			Negative						0.035	Negative
221	1	47266	Jersey	2	0.029	Negative			Negative						0.029	Negative
222	1	47747	Jersey	2	0.046	Negative			Negative						0.046	Negative
223	1	47780	Jersey	2	0.202	Negative			Negative						0.202	Negative
224	1	48111	Jersey	2	0.052	Negative			Negative						0.052	Negative
225	1	47827	Jersey	2	0.275	Negative			Negative						0.275	Negative
226	1	44729	Jersey	2	0.017	Negative			Negative						0.017	Negative
227	1	44062	Jersey	2	0.12	Negative			Negative						0.12	Negative
228	1	47783	Jersey	2	0.014	Negative			Negative						0.014	Negative
229	1	45799	Jersey	2	0.022	Negative			Negative						0.022	Negative
230	1	49441	Jersey	2	0.003	Negative			Negative						0.003	Negative
231	1	46256	Jersey	2	0.047	Negative			Negative						0.047	Negative
232	1	47050	Jersey	2	0.029	Negative			Negative						0.029	Negative
233	1	44218	Jersey	2	0.018	Negative			Negative						0.018	Negative
234	1	47222	Jersey	2	0.03	Negative			Negative						0.03	Negative
235	1	46786	Jersey	2	0.269	Negative			Negative						0.269	Negative
236	1	47525	Jersey	2	0.05	Negative			Negative						0.05	Negative
237	1	46627	Jersey	2	0.032	Negative			Negative						0.032	Negative
238	1	47932	Jersey	2	0.035	Negative			Negative						0.035	Negative
239	1	40618	Jersey	2	0.338	Negative			Negative						0.338	Negative
240	1	47527	Jersey	2	0.372	Negative			Negative						0.372	Negative
241	1	48322	Jersey	2	0.029	Negative			Negative						0.029	Negative
242	1	47925	Jersey	2	0.077	Negative			Negative						0.077	Negative
243	1	47938	Jersey	2	0.311	Negative			Negative						0.311	Negative
244	1	43088	Jersey	2	0.115	Negative			Negative						0.115	Negative
245	1	47479	Jersey	2	0.048	Negative			Negative						0.048	Negative
246	1	47507	Jersey	2	0.007	Negative			Negative						0.007	Negative
247	1	47921	Jersey	2	0.449	Negative			Negative						0.449	Negative
248	1	46496	Jersey	2	0.041	Negative			Negative						0.041	Negative
249	1	46909	Jersey	2	0.025	Negative			Negative						0.025	Negative
250	1	44006	Jersey	2	0.119	Negative			Negative						0.119	Negative
251	1	40329	Jersey	2	0.141	Negative			Negative						0.141	Negative
252	1	46824	Jersey	2	0.043	Negative			Negative						0.043	Negative
253	1	47586	Jersey	2	0.106	Negative			Negative						0.106	Negative
254	1	46328	Jersey	2	0.035	Negative			Negative						0.035	Negative
255	1	48223	Jersey	2	0.006	Negative			Negative						0.006	Negative
256	1	47589	Jersey	2	0.032	Negative			Negative						0.032	Negative
257	1	47665	Jersey	2	0.004	Negative			Negative						0.004	Negative
258	1	46462	Jersey	2	0.018	Negative			Negative						0.018	Negative
259	1	41409	Jersey	2	0.026	Negative			Negative						0.026	Negative
260	1	45296	Jersey	2	0.006	Negative			Negative						0.006	Negative
261	1	48661	Jersey	3	0.046	Negative			Negative						0.046	Negative
262	1	44442	Jersey	3	0.043	Negative			Negative						0.043	Negative
263	1	47392	Jersey	3	0.023	Negative			Negative						0.023	Negative
264	1	45019	Jersey	3	0.032	Negative			Negative						0.032	Negative
265	1	27867	Jersey	3	0.018	Negative			Negative						0.018	Negative
266	1	42926	Jersey	3	0.343	Negative			Negative						0.343	Negative
267	1	49796	Jersey	3	0.054	Negative			Negative						0.054	Negative
268	1	32721	Jersey	3	0.007	Negative			Negative						0.007	Negative
269	1	44864	Jersey	3	0.47	Suspect			Negative	1	0.596				0.596	Positive
270	1	49103	Jersey	3	0.018	Negative			Negative						0.018	Negative
271	1	43079	Jersey	3	0.028	Negative			Negative						0.028	Negative
272	1	40453	Jersey	3	0.535	Suspect			Negative	1	0.727				0.727	Positive
273	1	44550	Jersey	3	0.012	Negative			Negative						0.012	Negative
274	1	37581	Jersey	3	0.05	Negative			Negative						0.05	Negative
275	1	38392	Jersey	3	0.622	Positive	1	0.611	Positive						0.611	Positive
276	1	48937	Jersey	3	0.022	Negative			Negative						0.022	Negative
277	1	46740	Jersey	3	0.464	Suspect			Negative	1	0.435				0.435	Negative
278	1	27176	Jersey	3	2.532	Positive	1	3.309	Positive						3.309	Positive
279	1	32987	Jersey	3	2.106	Positive	1	2.819	Positive						2.819	Positive
280	1	47338	Jersey	3	0.08	Negative			Negative						0.08	Negative
281	1	36098	Jersey	3	0.348	Negative			Negative						0.348	Negative
282	1	39309	Jersey	3	0.57	Positive			Negative	1	0.728				0.728	Positive
283	1	26203	Jersey	3	0.033	Negative			Negative						0.033	Negative
284	1	32923	Jersey	3	0.017	Negative			Negative						0.017	Negative
285	1	41617	Jersey	3	0.052	Negative			Negative						0.052	Negative
286	1	27838	Jersey	3	0.038	Negative			Negative						0.038	Negative
287	1	39568	Jersey	3	0.077	Negative			Negative						0.077	Negative
288	1	43285	Jersey	3	0.021	Negative			Negative						0.021	Negative
289	1	50598	Jersey	3	0.015	Negative			Negative						0.015	Negative
290	1	51061	Jersey	3	0.015	Negative			Negative						0.015	Negative
291	1	40624	Jersey	3	0.038	Negative			Negative						0.038	Negative
292	1	47825	Jersey	3	0.936	Positive	1	0.949	Positive						0.949	Positive
293	1	51685	Jersey	3	0.058	Negative			Negative						0.058	Negative
294	1	43775	Jersey	3	0.13	Negative			Negative						0.13	Negative
295	1	40441	Jersey	3	1.126	Positive	1	1.257	Positive						1.257	Positive
296	1	51483	Jersey	3	0.102	Negative			Negative						0.102	Negative
297	1	40775	Jersey	3	0.683	Positive	1	0.752	Positive						0.752	Positive
298	1	51378	Jersey	3	0.052	Negative			Negative						0.052	Negative
299	1	28154	Jersey	3	0.171	Negative			Negative						0.171	Negative
300	1	41046	Jersey	3	0.915	Positive	1	0.949	Positive						0.949	Positive
301	1	20709	Jersey	3	1.42	Positive	1	1.602	Positive						1.602	Positive
302	1	43779	Jersey	3	0.403	Negative			Negative						0.403	Negative
303	1	39111	Jersey	3	1.061	Positive	1	0.956	Positive						0.956	Positive
304	1	41558	Jersey	3	0.026	Negative			Negative						0.026	Negative
305	1	44201	Jersey	3	0.124	Negative			Negative						0.124	Negative
306	1	43856	Jersey	3	0.359	Negative			Negative						0.359	Negative
307	1	48870	Jersey	3	0.052	Negative			Negative						0.052	Negative
308	1	39123	Jersey	3	1.939	Positive	1	2.23	Positive						2.23	Positive
309	1	49139	Jersey	3	0.041	Negative			Negative						0.041	Negative
310	1	48962	Jersey	3	0.033	Negative			Negative						0.033	Negative
311	1	47791	Jersey	3	0.027	Negative			Negative						0.027	Negative
312	1	44835	Jersey	3	0.035	Negative			Negative						0.035	Negative
313	1	44853	Jersey	3	0.6	Positive	1	0.575	Positive						0.575	Positive
314	1	37237	Jersey	3	0.02	Negative			Negative						0.02	Negative
315	1	42810	Jersey	3	0.067	Negative			Negative						0.067	Negative
316	1	30405	Jersey	3	0.432	Negative			Negative						0.432	Negative
317	1	34366	Jersey	3	0.021	Negative			Negative						0.021	Negative
318	1	43384	Jersey	3	0.783	Positive	1	0.764	Positive						0.764	Positive
319	1	49974	Jersey	3	0.018	Negative			Negative						0.018	Negative
320	1	44206	Jersey	3	0.047	Negative			Negative						0.047	Negative
321	1	36055	Jersey	3	0.071	Negative			Negative						0.071	Negative
322	1	32737	Jersey	3	0.376	Negative			Negative						0.376	Negative
323	1	51094	Jersey	3	0.102	Negative			Negative						0.102	Negative
324	1	35567	Jersey	3	0.432	Negative			Negative						0.432	Negative
325	1	40175	Jersey	3	0.105	Negative			Negative						0.105	Negative
326	1	34276	Jersey	3	2.285	Positive	1	2.97	Positive						2.97	Positive
327	1	37920	Jersey	3	0.632	Positive	1	0.718	Positive						0.718	Positive
328	1	44566	Jersey	3	0.57	Positive			Negative	1	0.388		0.452		0.388	Negative
329	1	50239	Jersey	3	0.071	Negative			Negative						0.071	Negative
330	1	50839	Jersey	3	0.026	Negative			Negative						0.026	Negative
331	1	32845	Jersey	3	0.086	Negative			Negative						0.086	Negative
332	1	27236	Jersey	3	0.032	Negative			Negative						0.032	Negative
333	1	50927	Jersey	3	0.011	Negative			Negative						0.011	Negative
334	1	52074	Jersey	3	0.085	Negative			Negative						0.085	Negative
335	1	35122	Jersey	3	0.291	Negative			Negative						0.291	Negative
336	1	46089	Jersey	3	0.309	Negative			Negative						0.309	Negative
337	1	45496	Jersey	3	0.515	Suspect			Negative	1	0.453				0.453	Suspect
338	1	44015	Jersey	3	0.035	Negative			Negative						0.035	Negative
339	1	50429	Jersey	3	0.027	Negative			Negative						0.027	Negative
340	1	43232	Jersey	3	0.461	Suspect			Negative	1	0.437				0.437	Negative
341	1	30155	Jersey	3	0.021	Negative			Negative						0.021	Negative
342	1	31651	Jersey	3	0.141	Negative			Negative						0.141	Negative
343	1	40962	Jersey	3	0.029	Negative			Negative						0.029	Negative
344	1	44982	Jersey	3	0.326	Negative			Negative						0.326	Negative
345	1	43552	Jersey	3	0.365	Negative			Negative						0.365	Negative
346	1	47313	Jersey	3	0.327	Negative			Negative						0.327	Negative
347	1	27756	Jersey	3	0.98	Positive	1	0.924	Positive						0.924	Positive
348	1	44867	Jersey	3	0.021	Negative			Negative						0.021	Negative
349	1	45208	Jersey	3	0.161	Negative			Negative						0.161	Negative
350	1	44579	Jersey	3	0.298	Negative			Negative						0.298	Negative
351	1	38319	Jersey	3	0.35	Negative			Negative						0.35	Negative
352	1	50263	Jersey	3	0.045	Negative			Negative						0.045	Negative
353	1	50518	Jersey	3	0.014	Negative			Negative						0.014	Negative
354	1	46111	Jersey	3	0.033	Negative			Negative						0.033	Negative
355	1	50923	Jersey	3	0.02	Negative			Negative						0.02	Negative
356	1	42615	Jersey	3	0.021	Negative			Negative						0.021	Negative
357	1	44767	Jersey	3	0.589	Positive			Negative	1	0.531				0.531	Suspect
358	1	44526	Jersey	3	0.473	Suspect			Negative	1	0.521				0.521	Suspect
359	1	42196	Jersey	3	0.365	Negative			Negative						0.365	Negative
360	1	44901	Jersey	3	0.498	Suspect			Negative	1	0.482				0.482	Suspect
361	1	41251	Jersey	3	0.611	Positive	1	0.57	Positive						0.57	Positive
362	1	35713	Jersey	3	0.298	Negative			Negative						0.298	Negative
363	1	40025	Jersey	3	0.523	Suspect			Negative	1	0.49				0.49	Suspect
364	1	45682	Jersey	1	0.021	Negative			Negative						0.021	Negative
365	1	47311	Jersey	1	0.074	Negative			Negative						0.074	Negative
366	1	44844	Jersey	1	0.306	Negative			Negative						0.306	Negative
367	1	44584	Jersey	1	0.302	Negative			Negative						0.302	Negative
368	1	47683	Jersey	1	0.327	Negative			Negative						0.327	Negative
369	1	44480	Jersey	1	0.353	Negative			Negative						0.353	Negative
370	1	48203	Jersey	1	0.028	Negative			Negative						0.028	Negative
371	1	47160	Jersey	1	0.023	Negative			Negative						0.023	Negative
372	1	44869	Jersey	1	0.035	Negative			Negative						0.035	Negative
373	1	45753	Jersey	1	0.025	Negative			Negative						0.025	Negative
374	1	43396	Jersey	1	0.019	Negative			Negative						0.019	Negative
375	1	45240	Jersey	1	0.013	Negative			Negative						0.013	Negative
376	1	44304	Jersey	1	0	Negative			Negative						0	Negative
377	1	46960	Jersey	1	0.008	Negative			Negative						0.008	Negative
378	1	45197	Jersey	1	0.021	Negative			Negative						0.021	Negative
379	1	48476	Jersey	1	0.02	Negative			Negative						0.02	Negative
380	1	44255	Jersey	1	0.02	Negative			Negative						0.02	Negative
381	1	44038	Jersey	1	0.08	Negative			Negative						0.08	Negative
382	1	48897	Jersey	1	0.02	Negative			Negative						0.02	Negative
383	1	45258	Jersey	1	0.024	Negative			Negative						0.024	Negative
384	1	41666	Jersey	1	0.058	Negative			Negative						0.058	Negative
385	1	44858	Jersey	1	0.035	Negative			Negative						0.035	Negative
386	1	48687	Jersey	1	0.146	Negative			Negative						0.146	Negative
387	1	47258	Jersey	1	0.021	Negative			Negative						0.021	Negative
388	1	40561	Jersey	1	0.009	Negative			Negative						0.009	Negative
389	1	44849	Jersey	1	0.286	Negative			Negative						0.286	Negative
390	1	45494	Jersey	1	0.083	Negative			Negative						0.083	Negative
391	1	48116	Jersey	1	0.014	Negative			Negative						0.014	Negative
392	1	44506	Jersey	1	0.017	Negative			Negative						0.017	Negative
393	1	45508	Jersey	1	0.061	Negative			Negative						0.061	Negative
394	1	44130	Jersey	1	0.051	Negative			Negative						0.051	Negative
395	1	47552	Jersey	1	0.024	Negative			Negative						0.024	Negative
396	1	47208	Jersey	1	0.006	Negative			Negative						0.006	Negative
397	1	46624	Jersey	1	0.019	Negative			Negative						0.019	Negative
398	1	47472	Jersey	1	0.39	Negative			Negative						0.39	Negative
399	1	47261	Jersey	1	0.036	Negative			Negative						0.036	Negative
400	1	47499	Jersey	1	0.054	Negative			Negative						0.054	Negative
401	1	45128	Jersey	1	0.009	Negative			Negative						0.009	Negative
402	1	46696	Jersey	1	0.262	Negative			Negative						0.262	Negative
403	1	45237	Jersey	1	0.01	Negative			Negative						0.01	Negative
404	1	45314	Jersey	1	0.045	Negative			Negative						0.045	Negative
405	1	43680	Jersey	1	0.136	Negative			Negative						0.136	Negative
406	1	41257	Jersey	1	0.07	Negative			Negative						0.07	Negative
407	1	43729	Jersey	1	0.109	Negative			Negative						0.109	Negative
408	1	48570	Jersey	1	0.013	Negative			Negative						0.013	Negative
409	1	48422	Jersey	1	0.476	Suspect			Negative	1	0.482				0.482	Suspect
410	1	38793	Jersey	1	0.132	Negative			Negative						0.132	Negative
411	1	48816	Jersey	1	0.031	Negative			Negative						0.031	Negative
412	1	48187	Jersey	1	0.017	Negative			Negative						0.017	Negative
413	1	42917	Jersey	1	0.138	Negative			Negative						0.138	Negative
414	1	48648	Jersey	1	0.013	Negative			Negative						0.013	Negative
415	1	48008	Jersey	1	0.021	Negative			Negative						0.021	Negative
416	1	44624	Jersey	1	0.313	Negative			Negative						0.313	Negative
417	1	45404	Jersey	1	0.009	Negative			Negative						0.009	Negative
418	1	47719	Jersey	1	0.017	Negative			Negative						0.017	Negative
419	1	44701	Jersey	1	0.176	Negative			Negative						0.176	Negative
420	1	45075	Jersey	1	0	Negative			Negative						0	Negative
421	1	44877	Jersey	1	0.082	Negative			Negative						0.082	Negative
422	1	45225	Jersey	1	0.09	Negative			Negative						0.09	Negative
423	1	47891	Jersey	1	0.013	Negative			Negative						0.013	Negative
424	1	48613	Jersey	1	0.105	Negative			Negative						0.105	Negative
425	1	47778	Jersey	1	0.014	Negative			Negative						0.014	Negative
426	1	44684	Jersey	1	0.028	Negative			Negative						0.028	Negative
427	1	45174	Jersey	1	0.248	Negative			Negative						0.248	Negative
428	1	48709	Jersey	1	0.009	Negative			Negative						0.009	Negative
429	1	48567	Jersey	1	0.023	Negative			Negative						0.023	Negative
430	1	44605	Jersey	1	0.038	Negative			Negative						0.038	Negative
431	1	47205	Jersey	1	0.019	Negative			Negative						0.019	Negative
432	1	45843	Jersey	1	0.213	Negative			Negative						0.213	Negative
433	1	46846	Jersey	1	0.003	Negative			Negative						0.003	Negative
434	1	45411	Jersey	1	0.129	Negative			Negative						0.129	Negative
435	1	47062	Jersey	1	0.02	Negative			Negative						0.02	Negative
436	1	48381	Jersey	1	0.012	Negative			Negative						0.012	Negative
437	1	47190	Jersey	1	0.038	Negative			Negative						0.038	Negative
438	1	47592	Jersey	1	0.055	Negative			Negative						0.055	Negative
439	1	47032	Jersey	1	0.02	Negative			Negative						0.02	Negative
440	1	41445	Jersey	1	0.017	Negative			Negative						0.017	Negative
441	1	43651	Jersey	1	0.067	Negative			Negative						0.067	Negative
442	1	45681	Jersey	1	0.01	Negative			Negative						0.01	Negative
443	1	41133	Jersey	1	0.07	Negative			Negative						0.07	Negative
444	1	45121	Jersey	1	0.009	Negative			Negative						0.009	Negative
445	1	48798	Jersey	1	0.288	Negative			Negative						0.288	Negative
446	1	48048	Jersey	1	0.461	Suspect			Negative	1	0.55				0.55	Positive
447	1	48427	Jersey	1	0.151	Negative			Negative						0.151	Negative
448	1	45054	Jersey	1	0.416	Negative			Negative						0.416	Negative
449	1	44705	Jersey	1	0.009	Negative			Negative						0.009	Negative
450	1	45222	Jersey	1	0.061	Negative			Negative						0.061	Negative
451	1	51706	Jersey	1	0.02	Negative			Negative						0.02	Negative
452	1	48079	Jersey	1	0.017	Negative			Negative						0.017	Negative
453	1	47448	Jersey	1	0.016	Negative			Negative						0.016	Negative
454	1	44929	Jersey	1	0.017	Negative			Negative						0.017	Negative
455	1	48460	Jersey	1	0.164	Negative			Negative						0.164	Negative
456	1	48330	Jersey	1	0.041	Negative			Negative						0.041	Negative
457	1	43399	Jersey	1	0.041	Negative			Negative						0.041	Negative
458	1	44083	Jersey	1	0.192	Negative			Negative						0.192	Negative
459	1	48406	Jersey	1	0.383	Negative			Negative						0.383	Negative
460	1	48726	Jersey	1	0.006	Negative			Negative						0.006	Negative
461	1	44632	Jersey	1	0.079	Negative			Negative						0.079	Negative
462	1	48848	Jersey	1	0.053	Negative			Negative						0.053	Negative
463	1	44330	Jersey	1	0.036	Negative			Negative						0.036	Negative
464	1	47350	Jersey	1	0.032	Negative			Negative						0.032	Negative
465	1	48221	Jersey	1	0.106	Negative			Negative						0.106	Negative
466	1	48367	Jersey	1	0.052	Negative			Negative						0.052	Negative
467	1	44321	Jersey	1	0.125	Negative			Negative						0.125	Negative
468	1	46939	Jersey	1	0.1	Negative			Negative						0.1	Negative
469	1	48306	Jersey	1	0.025	Negative			Negative						0.025	Negative
470	1	44828	Jersey	1	0.032	Negative			Negative						0.032	Negative
471	1	45710	Jersey	1	0.051	Negative			Negative						0.051	Negative
472	1	45601	Jersey	1	0.061	Negative			Negative						0.061	Negative
473	1	45133	Jersey	1	0.031	Negative			Negative						0.031	Negative
474	1	41371	Jersey	1	0.032	Negative			Negative						0.032	Negative
475	1	45658	Jersey	1	0.032	Negative			Negative						0.032	Negative
476	1	41941	Jersey	1	0	Negative			Negative						0	Negative
477	1	46498	Jersey	1	0.375	Negative			Negative						0.375	Negative
478	1	41437	Jersey	1	0.131	Negative			Negative						0.131	Negative
479	1	44630	Jersey	1	0.012	Negative			Negative						0.012	Negative
480	1	41870	Jersey	1	0.007	Negative			Negative						0.007	Negative
481	1	45526	Jersey	1	0.02	Negative			Negative						0.02	Negative
482	1	48058	Jersey	1	0.024	Negative			Negative						0.024	Negative
483	1	48547	Jersey	1	0.119	Negative			Negative						0.119	Negative
484	1	47469	Jersey	1	0.01	Negative			Negative						0.01	Negative
485	1	45180	Jersey	1	0.013	Negative			Negative						0.013	Negative
486	1	45624	Jersey	1	0.026	Negative			Negative						0.026	Negative
487	1	48119	Jersey	1	0.308	Negative			Negative						0.308	Negative
488	1	42465	Jersey	1	0.024	Negative			Negative						0.024	Negative
489	1	45937	Jersey	1	0.014	Negative			Negative						0.014	Negative
490	1	39472	Jersey	1	0.304	Negative			Negative						0.304	Negative
491	1	47998	Jersey	1	0.634	Positive	1	0.77	Positive						0.77	Positive
492	1	44046	Jersey	1	0.01	Negative			Negative						0.01	Negative
493	1	45170	Jersey	1	0.012	Negative			Negative						0.012	Negative
494	1	48461	Jersey	1	0.083	Negative			Negative						0.083	Negative
495	1	45136	Jersey	1	0.029	Negative			Negative						0.029	Negative
496	1	45498	Jersey	1	0.043	Negative			Negative						0.043	Negative
497	1	47413	Jersey	1	0.022	Negative			Negative						0.022	Negative
498	1	45014	Jersey	1	0.029	Negative			Negative						0.029	Negative
499	1	45450	Jersey	1	0.018	Negative			Negative						0.018	Negative
500	1	40396	Jersey	1	0.013	Negative			Negative						0.013	Negative
501	1	48491	Jersey	1	0.019	Negative			Negative						0.019	Negative
502	1	45586	Jersey	1	0.008	Negative			Negative						0.008	Negative
503	1	45789	Jersey	1	0.051	Negative			Negative						0.051	Negative
504	1	44696	Jersey	1	0.239	Negative			Negative						0.239	Negative
505	1	45915	Jersey	1	0.018	Negative			Negative						0.018	Negative
506	1	47800	Jersey	1	0.101	Negative			Negative						0.101	Negative
507	1	45461	Jersey	1	0.208	Negative			Negative						0.208	Negative
508	1	47934	Jersey	1	0.296	Negative			Negative						0.296	Negative
509	1	45643	Jersey	1	0.032	Negative			Negative						0.032	Negative
510	1	44930	Jersey	1	0.041	Negative			Negative						0.041	Negative
511	1	45567	Jersey	1	0.073	Negative			Negative						0.073	Negative
512	1	45056	Jersey	1	0.02	Negative			Negative						0.02	Negative
513	1	42443	Jersey	1	0.051	Negative			Negative						0.051	Negative
514	1	45268	Jersey	1	0.018	Negative			Negative						0.018	Negative
515	1	48695	Jersey	1	0.032	Negative			Negative						0.032	Negative
516	1	45762	Jersey	1	0.135	Negative			Negative						0.135	Negative
517	1	45250	Jersey	1	0.233	Negative			Negative						0.233	Negative
518	1	45734	Jersey	1	0.045	Negative			Negative						0.045	Negative
519	1	45629	Jersey	1	0.023	Negative			Negative						0.023	Negative
520	1	47775	Jersey	1	0.258	Negative			Negative						0.258	Negative
521	1	44716	Jersey	1	0.1	Negative			Negative						0.1	Negative
522	1	45844	Jersey	1	0.283	Negative			Negative						0.283	Negative
523	1	45037	Jersey	1	0.029	Negative			Negative						0.029	Negative
524	1	43199	Jersey	1	0.088	Negative			Negative						0.088	Negative
525	1	45193	Jersey	1	0.241	Negative			Negative						0.241	Negative
526	1	44211	Jersey	1	0.018	Negative			Negative						0.018	Negative
527	1	45485	Jersey	1	0.024	Negative			Negative						0.024	Negative
528	1	48451	Jersey	1	0.028	Negative			Negative						0.028	Negative
529	1	43527	Jersey	1	0.243	Negative			Negative						0.243	Negative
530	1	45889	Jersey	1	0.013	Negative			Negative						0.013	Negative
531	1	43075	Jersey	1	0.052	Negative			Negative						0.052	Negative
532	1	47798	Jersey	1	0.008	Negative			Negative						0.008	Negative
533	1	43974	Jersey	1	0.097	Negative			Negative						0.097	Negative
534	1	43780	Jersey	1	0.031	Negative			Negative						0.031	Negative
535	1	45251	Jersey	1	0.362	Negative			Negative						0.362	Negative
536	1	48436	Jersey	1	0.016	Negative			Negative						0.016	Negative
537	1	48018	Jersey	1	0.043	Negative			Negative						0.043	Negative
538	1	48401	Jersey	1	0.01	Negative			Negative						0.01	Negative
539	1	45862	Jersey	1	0.066	Negative			Negative						0.066	Negative
540	1	48980	Jersey	1	0.034	Negative			Negative						0.034	Negative
541	1	45020	Jersey	1	0.022	Negative			Negative						0.022	Negative
542	1	48909	Jersey	1	0.014	Negative			Negative						0.014	Negative
543	1	48586	Jersey	1	0.018	Negative			Negative						0.018	Negative
544	1	47883	Jersey	1	0.203	Negative			Negative						0.203	Negative
545	1	48019	Jersey	1	0.154	Negative			Negative						0.154	Negative
546	1	45394	Jersey	1	0.03	Negative			Negative						0.03	Negative
547	1	45600	Jersey	1	0.341	Negative			Negative						0.341	Negative
548	1	45751	Jersey	1	0.484	Suspect			Negative	1	0.491				0.491	Suspect
549	1	45552	Jersey	1	0.007	Negative			Negative						0.007	Negative
550	1	43139	Jersey	1	0.04	Negative			Negative						0.04	Negative
551	1	43942	Jersey	1	0.019	Negative			Negative						0.019	Negative
552	1	48298	Jersey	1	0.191	Negative			Negative						0.191	Negative
553	1	44327	Jersey	1	0.019	Negative			Negative						0.019	Negative
554	1	48105	Jersey	1	0.06	Negative			Negative						0.06	Negative
555	1	47518	Jersey	1	0.048	Negative			Negative						0.048	Negative
556	1	44483	Jersey	1	0.019	Negative			Negative						0.019	Negative
1	2	46783	Jersey	1	0.061	Negative			Negative						0.061	Negative
2	2	44462	Jersey	1	0.029	Negative			Negative						0.029	Negative
3	2	47610	Jersey	1	0.029	Negative			Negative						0.029	Negative
4	2	46308	Jersey	1	0.058	Negative			Negative						0.058	Negative
5	2	47122	Jersey	1	0.075	Negative			Negative						0.075	Negative
6	2	45884	Jersey	1	0.123	Negative			Negative						0.123	Negative
7	2	46636	Jersey	1	0.04	Negative			Negative						0.04	Negative
8	2	37347	Jersey	1	0.048	Negative			Negative						0.048	Negative
9	2	45983	Jersey	1	0.008	Negative			Negative						0.008	Negative
10	2	46399	Jersey	1	0.036	Negative			Negative						0.036	Negative
11	2	41481	Jersey	1	0.025	Negative			Negative						0.025	Negative
12	2	45835	Jersey	1	0.054	Negative			Negative						0.054	Negative
13	2	39215	Jersey	1	0.019	Negative			Negative						0.019	Negative
14	2	46623	Jersey	1	0.05	Negative			Negative						0.05	Negative
15	2	46105	Jersey	1	0.109	Negative			Negative						0.109	Negative
16	2	43597	Jersey	1	0.395	Negative			Negative						0.395	Negative
17	2	39777	Jersey	1	0.136	Negative			Negative						0.136	Negative
18	2	46276	Jersey	1	0.046	Negative			Negative						0.046	Negative
19	2	43841	Jersey	1	0.131	Negative			Negative						0.131	Negative
20	2	43674	Jersey	1	0.021	Negative			Negative						0.021	Negative
21	2	43169	Jersey	1	0.069	Negative			Negative						0.069	Negative
22	2	46914	Jersey	1	0.067	Negative			Negative						0.067	Negative
23	2	44988	Jersey	1	0.05	Negative			Negative						0.05	Negative
24	2	44079	Jersey	1	0.004	Negative			Negative						0.004	Negative
25	2	42537	Jersey	1	0.019	Negative			Negative						0.019	Negative
26	2	41359	Jersey	1	0.04	Negative			Negative						0.04	Negative
27	2	46084	Jersey	1	0.012	Negative			Negative						0.012	Negative
28	2	44143	Jersey	1	0.029	Negative			Negative						0.029	Negative
29	2	43367	Jersey	1	0.061	Negative			Negative						0.061	Negative
30	2	46025	Jersey	1	0.071	Negative			Negative						0.071	Negative
31	2	46987	Jersey	1	0.09	Negative			Negative						0.09	Negative
32	2	1374	Jersey	1	0.044	Negative			Negative						0.044	Negative
33	2	47042	Jersey	1	0.013	Negative			Negative						0.013	Negative
34	2	41107	Jersey	1	0.038	Negative			Negative						0.038	Negative
35	2	46333	Jersey	1	0.031	Negative			Negative						0.031	Negative
36	2	42725	Jersey	1	0.027	Negative			Negative						0.027	Negative
37	2	47242	Jersey	1	0.023	Negative			Negative						0.023	Negative
38	2	46974	Jersey	1	0.021	Negative			Negative						0.021	Negative
39	2	47228	Jersey	1	0.038	Negative			Negative						0.038	Negative
40	2	43226	Jersey	1	0.035	Negative			Negative						0.035	Negative
41	2	43670	Jersey	1	0.023	Negative			Negative						0.023	Negative
42	2	47233	Jersey	1	0.073	Negative			Negative						0.073	Negative
43	2	42687	Jersey	1	0.019	Negative			Negative						0.019	Negative
44	2	45841	Jersey	1	0.023	Negative			Negative						0.023	Negative
45	2	43182	Jersey	1	0.033	Negative			Negative						0.033	Negative
46	2	46629	Jersey	1	0.035	Negative			Negative						0.035	Negative
47	2	44308	Jersey	1	0.081	Negative			Negative						0.081	Negative
48	2	44542	Jersey	1	0.036	Negative			Negative						0.036	Negative
49	2	45237	Jersey	1	0.06	Negative			Negative						0.06	Negative
50	2	47095	Jersey	1	0.048	Negative			Negative						0.048	Negative
51	2	43776	Jersey	1	0.031	Negative			Negative						0.031	Negative
52	2	43844	Jersey	1	0.075	Negative			Negative						0.075	Negative
53	2	43520	Jersey	1	0.079	Negative			Negative						0.079	Negative
54	2	42673	Jersey	1	0.061	Negative			Negative						0.061	Negative
55	2	46445	Jersey	1	0.033	Negative			Negative						0.033	Negative
56	2	39252	Jersey	1	0.574	Positive			Negative	1	0.542	Suspect			0.542	Suspect
57	2	41877	Jersey	1	0.042	Negative			Negative						0.042	Negative
58	2	47172	Jersey	1	0.058	Negative			Negative						0.058	Negative
59	2	43796	Jersey	1	0.015	Negative			Negative						0.015	Negative
60	2	39509	Jersey	1	0.019	Negative			Negative						0.019	Negative
61	2	44624	Jersey	1	0.117	Negative			Negative						0.117	Negative
62	2	39587	Jersey	1	0.073	Negative			Negative						0.073	Negative
63	2	43884	Jersey	1	0.04	Negative			Negative						0.04	Negative
64	2	40890	Jersey	1	0.036	Negative			Negative						0.036	Negative
65	2	42158	Jersey	1	0.029	Negative			Negative						0.029	Negative
66	2	44144	Jersey	1	0.017	Negative			Negative						0.017	Negative
67	2	47193	Jersey	1	0.04	Negative			Negative						0.04	Negative
68	2	42959	Jersey	1	0.036	Negative			Negative						0.036	Negative
69	2	45019	Jersey	1	0.021	Negative			Negative						0.021	Negative
70	2	47007	Jersey	1	0.013	Negative			Negative						0.013	Negative
71	2	45799	Jersey	1	0.019	Negative			Negative						0.019	Negative
72	2	46433	Jersey	1	0.033	Negative			Negative						0.033	Negative
73	2	9292	Jersey	1	0.061	Negative			Negative				1.551	Positive	1.551	Positive
74	2	43878	Jersey	1	1.536	Positive	1	0.017	Negative				0.023	Negative	0.023	Negative
75	2	6228	Jersey	1	0.027	Negative			Negative				0.008	Negative	0.008	Negative
76	2	43531	Jersey	1	0.038	Negative			Negative						0.038	Negative
77	2	42507	Jersey	1	0.036	Negative			Negative						0.036	Negative
78	2	22525	Jersey	1	0.789	Positive	1	0.825	Positive						0.825	Positive
79	2	44259	Jersey	1	0.036	Negative			Negative						0.036	Negative
80	2	44757	Jersey	1	0.029	Negative			Negative						0.029	Negative
81	2	43890	Jersey	1	0.056	Negative			Negative						0.056	Negative
82	2	44641	Jersey	1	0.048	Negative			Negative						0.048	Negative
83	2	42152	Jersey	1	0.221	Negative			Negative						0.221	Negative
84	2	45647	Jersey	1	0.163	Negative			Negative						0.163	Negative
85	2	43639	Jersey	1	0.069	Negative			Negative				0.045	Negative	0.045	Negative
86	2	45623	Jersey	1	2.453	Positive	1	0.025	Negative				0.034	Negative	0.034	Negative
87	2	46865	Jersey	1	0.017	Negative			Negative				0.006	Negative	0.006	Negative
88	2	35394	Jersey	1	0.054	Negative			Negative						0.054	Negative
89	2	47366	Jersey	1	0.19	Negative			Negative						0.19	Negative
90	2	43934	Jersey	1	0.046	Negative			Negative						0.046	Negative
91	2	46888	Jersey	1	0.042	Negative			Negative						0.042	Negative
92	2	43981	Jersey	1	0.157	Negative			Negative						0.157	Negative
93	2	42822	Jersey	1	0.044	Negative			Negative						0.044	Negative
94	2	46924	Jersey	1	0.026	Negative			Negative						0.026	Negative
95	2	42695	Jersey	1	0.055	Negative			Negative						0.055	Negative
96	2	43733	Jersey	1	0.031	Negative			Negative						0.031	Negative
97	2	43327	Jersey	1	0.122	Negative			Negative						0.122	Negative
98	2	43771	Jersey	1	0.022	Negative			Negative						0.022	Negative
99	2	19699	Jersey	1	0.075	Negative			Negative						0.075	Negative
100	2	44383	Jersey	1	0.009	Negative			Negative						0.009	Negative
101	2	46973	Jersey	1	0.029	Negative			Negative						0.029	Negative
102	2	43653	Jersey	1	0.046	Negative			Negative						0.046	Negative
103	2	43243	Jersey	1	0.046	Negative			Negative						0.046	Negative
104	2	41558	Jersey	1	0.036	Negative			Negative						0.036	Negative
105	2	21151	Jersey	1	0.084	Negative			Negative						0.084	Negative
106	2	47175	Jersey	1	0.022	Negative			Negative						0.022	Negative
107	2	43356	Jersey	1	0.055	Negative			Negative						0.055	Negative
108	2	42872	Jersey	1	2.359	Positive	1	2.512	Positive						2.512	Positive
109	2	43946	Jersey	1	2.318	Positive	1	2.156	Positive						2.156	Positive
110	2	45718	Jersey	1	0.184	Negative			Negative						0.184	Negative
111	2	42698	Jersey	1	0.046	Negative			Negative						0.046	Negative
112	2	46217	Jersey	1	0.126	Negative			Negative						0.126	Negative
113	2	40946	Jersey	1	0.104	Negative			Negative						0.104	Negative
114	2	47254	Jersey	1	0.016	Negative			Negative						0.016	Negative
115	2	46518	Jersey	1	0.036	Negative			Negative						0.036	Negative
116	2	43922	Jersey	1	0.031	Negative			Negative						0.031	Negative
117	2	42946	Jersey	1	0.011	Negative			Negative						0.011	Negative
118	2	47139	Jersey	1	0.066	Negative			Negative						0.066	Negative
119	2	44242	Jersey	1	0.069	Negative			Negative						0.069	Negative
120	2	46541	Jersey	1	0.038	Negative			Negative						0.038	Negative
121	2	44352	Jersey	1	0.024	Negative			Negative						0.024	Negative
122	2	42700	Jersey	1	0.062	Negative			Negative						0.062	Negative
123	2	46566	Jersey	1	0.035	Negative			Negative						0.035	Negative
124	2	43960	Jersey	1	0.095	Negative			Negative						0.095	Negative
125	2	41441	Jersey	1	0.164	Negative			Negative						0.164	Negative
126	2	45748	Jersey	1	0.044	Negative			Negative						0.044	Negative
127	2	47984	Jersey	1	0.223	Negative			Negative						0.223	Negative
128	2	3058	Jersey	1	0.042	Negative			Negative						0.042	Negative
129	2	44317	Jersey	1	0.031	Negative			Negative						0.031	Negative
130	2	40444	Jersey	1	0.031	Negative			Negative						0.031	Negative
131	2	46229	Jersey	1	0.035	Negative			Negative						0.035	Negative
132	2	42131	Jersey	1	0.089	Negative			Negative						0.089	Negative
133	2	43021	Jersey	1	0.036	Negative			Negative						0.036	Negative
134	2	43811	Jersey	1	0.016	Negative			Negative						0.016	Negative
135	2	41608	Jersey	1	0.091	Negative			Negative						0.091	Negative
136	2	46104	Jersey	1	0.069	Negative			Negative						0.069	Negative
137	2	45909	Jersey	1	0.082	Negative			Negative						0.082	Negative
138	2	42902	Jersey	1	0.038	Negative			Negative						0.038	Negative
139	2	43451	Jersey	1	0.099	Negative			Negative						0.099	Negative
140	2	46294	Jersey	1	0.031	Negative			Negative						0.031	Negative
141	2	42530	Jersey	1	0.015	Negative			Negative						0.015	Negative
142	2	43724	Jersey	1	0.062	Negative			Negative						0.062	Negative
143	2	46226	Jersey	1	0.016	Negative			Negative						0.016	Negative
144	2	42141	Jersey	1	0.031	Negative			Negative						0.031	Negative
145	2	43494	Jersey	1	0.057	Negative			Negative						0.057	Negative
146	2	42897	Jersey	1	0.064	Negative			Negative						0.064	Negative
147	2	43446	Jersey	1	0.036	Negative			Negative						0.036	Negative
148	2	46262	Jersey	1	0.051	Negative			Negative						0.051	Negative
149	2	43330	Jersey	1	0.024	Negative			Negative						0.024	Negative
150	2	43912	Jersey	1	0.031	Negative			Negative						0.031	Negative
151	2	43735	Jersey	1	0.031	Negative			Negative						0.031	Negative
152	2	43674	Jersey	1	0.049	Negative			Negative						0.049	Negative
153	2	46298	Jersey	1	0.035	Negative			Negative						0.035	Negative
154	2	39762	Jersey	1	0.036	Negative			Negative						0.036	Negative
155	2	43259	Jersey	1	0.051	Negative			Negative						0.051	Negative
156	2	47025	Jersey	1	0.035	Negative			Negative						0.035	Negative
157	2	43540	Jersey	1	0.051	Negative			Negative						0.051	Negative
158	2	18163	Jersey	1	0.055	Negative			Negative						0.055	Negative
159	2	43287	Jersey	1	0.035	Negative			Negative						0.035	Negative
160	2	43963	Jersey	1	0.038	Negative			Negative						0.038	Negative
161	2	39640	Jersey	1	0.137	Negative			Negative						0.137	Negative
162	2	44590	Jersey	1	0.257	Negative			Negative						0.257	Negative
163	2	19844	Jersey	1	0.064	Negative			Negative						0.064	Negative
164	2	46369	Jersey	1	0.029	Negative			Negative						0.029	Negative
165	2	42010	Jersey	1	0.029	Negative			Negative						0.029	Negative
166	2	47091	Jersey	1	0.044	Negative			Negative						0.044	Negative
167	2	46462	Jersey	1	0.184	Negative			Negative						0.184	Negative
168	2	46982	Jersey	1	0.024	Negative			Negative						0.024	Negative
169	2	43561	Jersey	1	0.038	Negative			Negative						0.038	Negative
170	2	46615	Jersey	1	0.075	Negative			Negative						0.075	Negative
171	2	43066	Jersey	1	0.055	Negative			Negative						0.055	Negative
172	2	42488	Jersey	1	0.044	Negative			Negative						0.044	Negative
173	2	43194	Jersey	1	0.029	Negative			Negative						0.029	Negative
174	2	43000	Jersey	1	0.024	Negative			Negative						0.024	Negative
175	2	43908	Jersey	1	0.035	Negative			Negative						0.035	Negative
176	2	47986	Jersey	1	0.029	Negative			Negative						0.029	Negative
177	2	44187	Jersey	1	0.042	Negative			Negative						0.042	Negative
178	2	46585	Jersey	1	0.035	Negative			Negative						0.035	Negative
179	2	43678	Jersey	1	0.104	Negative			Negative						0.104	Negative
180	2	43939	Jersey	1	0.155	Negative			Negative						0.155	Negative
181	2	42829	Jersey	1	0.026	Negative			Negative						0.026	Negative
182	2	43892	Jersey	1	0.077	Negative			Negative						0.077	Negative
183	2	44037	Jersey	1	0.016	Negative			Negative						0.016	Negative
184	2	45168	Jersey	1	0.075	Negative			Negative						0.075	Negative
185	2	43918	Jersey	1	0.038	Negative			Negative						0.038	Negative
186	2	42266	Jersey	1	0.031	Negative			Negative						0.031	Negative
187	2	157	Jersey	1	0.015	Negative			Negative						0.015	Negative
188	2	45985	Jersey	1	0.025	Negative			Negative						0.025	Negative
189	2	43368	Jersey	1	0.051	Negative			Negative						0.051	Negative
190	2	45680	Jersey	1	0.071	Negative			Negative						0.071	Negative
191	2	42444	Jersey	1	0.026	Negative			Negative						0.026	Negative
192	2	23013	Jersey	1	0.005	Negative			Negative						0.005	Negative
193	2	45893	Jersey	1	0.02	Negative			Negative						0.02	Negative
194	2	44230	Jersey	1	0.033	Negative			Negative						0.033	Negative
195	2	46097	Jersey	1	0.033	Negative			Negative						0.033	Negative
196	2	47077	Jersey	1	0.044	Negative			Negative						0.044	Negative
197	2	46619	Jersey	1	0.016	Negative			Negative						0.016	Negative
198	2	22967	Jersey	1	0.016	Negative			Negative						0.016	Negative
199	2	46409	Jersey	1	0.041	Negative			Negative						0.041	Negative
200	2	44360	Jersey	1	0.016	Negative			Negative						0.016	Negative
201	2	45959	Jersey	1	0.021	Negative			Negative						0.021	Negative
202	2	43231	Jersey	1	0.04	Negative			Negative						0.04	Negative
203	2	43586	Jersey	1	0.114	Negative			Negative						0.114	Negative
204	2	39871	Jersey	1	0.031	Negative			Negative						0.031	Negative
205	2	47084	Jersey	1	0.44	Negative			Negative						0.44	Negative
206	2	47422	Jersey	1	0.007	Negative			Negative						0.007	Negative
207	2	45707	Jersey	1	0.028	Negative			Negative						0.028	Negative
208	2	43557	Jersey	1	0.026	Negative			Negative						0.026	Negative
209	2	42828	Jersey	1	0.01	Negative			Negative						0.01	Negative
210	2	46266	Jersey	1	0.033	Negative			Negative						0.033	Negative
211	2	42488	Jersey	1	0.035	Negative			Negative						0.035	Negative
212	2	43741	Jersey	1	0.023	Negative			Negative						0.023	Negative
213	2	22954	Jersey	1	0.072	Negative			Negative						0.072	Negative
214	2	44742	Jersey	1	0.013	Negative			Negative						0.013	Negative
215	2	42939	Jersey	1	0.041	Negative			Negative						0.041	Negative
216	2	43805	Jersey	1	0.023	Negative			Negative						0.023	Negative
217	2	45984	Jersey	1	0.005	Negative			Negative						0.005	Negative
218	2	44154	Jersey	1	0.035	Negative			Negative						0.035	Negative
219	2	44010	Jersey	1	0.03	Negative			Negative						0.03	Negative
220	2	45943	Jersey	1	0.028	Negative			Negative						0.028	Negative
221	2	5955	Jersey	1	0	Negative			Negative				0	Negative	0	Negative
222	2	46372	Jersey	3	0.85	Positive	1	0.015	Negative				0.025	Negative	0.025	Negative
223	2	42763	Jersey	3	0.072	Negative			Negative				0.042	Negative	0.042	Negative
224	2	41125	Jersey	3	0.013	Negative			Negative						0.013	Negative
225	2	43551	Jersey	3	0.04	Negative			Negative						0.04	Negative
226	2	41037	Jersey	3	0.147	Negative			Negative						0.147	Negative
227	2	45360	Jersey	2	0.201	Negative			Negative						0.201	Negative
228	2	41287	Jersey	3	0.046	Negative			Negative						0.046	Negative
229	2	45326	Jersey	3	0.031	Negative			Negative						0.031	Negative
230	2	45015	Jersey	3	0.056	Negative			Negative						0.056	Negative
231	2	43134	Jersey	3	0.061	Negative			Negative						0.061	Negative
232	2	46238	Jersey	3	0.036	Negative			Negative						0.036	Negative
233	2	45780	Jersey	3	0.188	Negative			Negative						0.188	Negative
234	2	45163	Jersey	3	0.198	Negative			Negative						0.198	Negative
235	2	43097	Jersey	3	0.387	Negative			Negative						0.387	Negative
236	2	43528	Jersey	3	0.079	Negative			Negative						0.079	Negative
237	2	19874	Jersey	3	2.115	Positive	1	2.309	Positive						2.309	Positive
238	2	41954	Jersey	3	0.064	Negative			Negative						0.064	Negative
239	2	45783	Jersey	3	0.105	Negative			Negative						0.105	Negative
240	2	46024	Jersey	3	0.028	Negative			Negative						0.028	Negative
241	2	40333	Jersey	3	0.104	Negative			Negative						0.104	Negative
242	2	45575	Jersey	3	0.018	Negative			Negative						0.018	Negative
243	2	38062	Jersey	2	0.102	Negative			Negative						0.102	Negative
244	2	39473	Jersey	3	0.054	Negative			Negative						0.054	Negative
245	2	35204	Jersey	2	0.077	Negative			Negative						0.077	Negative
246	2	37932	Jersey	3	0.044	Negative			Negative						0.044	Negative
247	2	40383	Jersey	3	0.323	Negative			Negative						0.323	Negative
248	2	40099	Jersey	2	0.056	Negative			Negative						0.056	Negative
249	2	43590	Jersey	2	0.091	Negative			Negative						0.091	Negative
250	2	28018	Jersey	3	0.104	Negative			Negative						0.104	Negative
251	2	41999	Jersey	3	0.04	Negative			Negative						0.04	Negative
252	2	38938	Jersey	3	0.193	Negative			Negative						0.193	Negative
253	2	36506	Jersey	3	0.079	Negative			Negative						0.079	Negative
254	2	41064	Jersey	2	0.035	Negative			Negative						0.035	Negative
255	2	43764	Jersey	3	0.031	Negative			Negative						0.031	Negative
256	2	46059	Jersey	3	0.15	Negative			Negative						0.15	Negative
257	2	44326	Jersey	3	0.023	Negative			Negative						0.023	Negative
258	2	43558	Jersey	3	0.049	Negative			Negative						0.049	Negative
259	2	45518	Jersey	3	0.031	Negative			Negative						0.031	Negative
260	2	42576	Jersey	2	0.021	Negative			Negative						0.021	Negative
261	2	17934	Jersey	3	0.157	Negative			Negative						0.157	Negative
262	2	42728	Jersey	3	0.035	Negative			Negative						0.035	Negative
263	2	46264	Jersey	3	0.02	Negative			Negative						0.02	Negative
264	2	43174	Jersey	3	0.035	Negative			Negative						0.035	Negative
265	2	45859	Jersey	3	0.041	Negative			Negative						0.041	Negative
266	2	46431	Jersey	3	0.542	Suspect			Negative	1	0.365	Negative	0.402	Negative	0.402	Negative
267	2	41141	Jersey	3	0.041	Negative			Negative						0.041	Negative
268	2	42405	Jersey	3	0.036	Negative			Negative						0.036	Negative
269	2	46179	Jersey	2	0.02	Negative			Negative						0.02	Negative
270	2	45980	Jersey	3	0.023	Negative			Negative						0.023	Negative
271	2	38243	Jersey	3	0.42	Negative			Negative						0.42	Negative
272	2	35602	Jersey	3	0.715	Positive	1	0.819	Positive						0.819	Positive
273	2	42890	Jersey	3	0.148	Negative			Negative						0.148	Negative
274	2	21054	Jersey	3	0.163	Negative			Negative						0.163	Negative
275	2	40127	Jersey	3	0.025	Negative			Negative						0.025	Negative
276	2	40204	Jersey	3	0.086	Negative			Negative						0.086	Negative
277	2	46072	Jersey	3	0.002	Negative			Negative						0.002	Negative
278	2	40960	Jersey	3	0.56	Positive			Negative	1	0.399	Negative	0.408	Negative	0.408	Negative
279	2	46251	Jersey	3	0	Negative			Negative						0	Negative
280	2	40528	Jersey	3	0.056	Negative			Negative						0.056	Negative
281	2	19216	Jersey	3	0.289	Negative			Negative						0.289	Negative
282	2	41643	Jersey	3	0.124	Negative			Negative						0.124	Negative
283	2	33106	Jersey	3	0.085	Negative			Negative						0.085	Negative
284	2	44429	Jersey	3	0.335	Negative			Negative						0.335	Negative
285	2	46224	Jersey	3	0.012	Negative			Negative						0.012	Negative
286	2	42661	Jersey	3	0.05	Negative			Negative						0.05	Negative
287	2	45950	Jersey	3	0.089	Negative			Negative						0.089	Negative
288	2	39489	Jersey	3	0.105	Negative			Negative						0.105	Negative
289	2	42857	Jersey	3	0.072	Negative			Negative						0.072	Negative
290	2	2843	Jersey	3	0.595	Positive			Negative	1	0.467	Suspect			0.467	Suspect
291	2	46354	Jersey	3	0.079	Negative			Negative						0.079	Negative
292	2	16105	Jersey	3	0.116	Negative			Negative						0.116	Negative
293	2	46233	Jersey	3	0.056	Negative			Negative						0.056	Negative
294	2	36730	Jersey	3	0.058	Negative			Negative						0.058	Negative
295	2	45349	Jersey	3	0.112	Negative			Negative						0.112	Negative
296	2	40683	Jersey	3	0.041	Negative			Negative						0.041	Negative
297	2	42777	Jersey	3	0.291	Negative			Negative						0.291	Negative
298	2	42734	Jersey	3	0.576	Positive			Negative	1	0.295	Negative	0.238	Negative	0.238	Negative
299	2	46093	Jersey	3	0.128	Negative			Negative						0.128	Negative
300	2	46240	Jersey	3	0.012	Negative			Negative						0.012	Negative
301	2	43310	Jersey	3	0.091	Negative			Negative						0.091	Negative
302	2	19967	Jersey	3	0.041	Negative			Negative						0.041	Negative
303	2	42743	Jersey	3	0.012	Negative			Negative						0.012	Negative
304	2	44586	Jersey	3	0.027	Negative			Negative						0.027	Negative
305	2	40664	Jersey	3	0.116	Negative			Negative						0.116	Negative
306	2	46410	Jersey	3	0.033	Negative			Negative						0.033	Negative
307	2	41047	Jersey	3	0.107	Negative			Negative						0.107	Negative
308	2	39279	Jersey	2	0.064	Negative			Negative						0.064	Negative
309	2	40659	Jersey	3	0.192	Negative			Negative						0.192	Negative
310	2	40892	Jersey	3	0.213	Negative			Negative						0.213	Negative
311	2	45610	Jersey	3	0.093	Negative			Negative						0.093	Negative
312	2	45528	Jersey	3	0.029	Negative			Negative						0.029	Negative
313	2	43071	Jersey	2	0.143	Negative			Negative						0.143	Negative
314	2	38055	Jersey	3	0.324	Negative			Negative						0.324	Negative
315	2	23081	Jersey	3	0.178	Negative			Negative						0.178	Negative
316	2	22216	Jersey	3	0.081	Negative			Negative						0.081	Negative
317	2	42947	Jersey	3	0.074	Negative			Negative				0.018	Negative	0.018	Negative
318	2	41189	Jersey	3	0.928	Positive	1	0.263	Negative				0.175	Negative	0.175	Negative
319	2	46330	Jersey	3	0.035	Negative			Negative				0.022	Negative	0.022	Negative
320	2	40627	Jersey	3	1.564	Positive	1	0.006	Negative				0.037	Negative	0.037	Negative
321	2	42462	Jersey	3	0.085	Negative			Negative				0.014	Negative	0.014	Negative
322	2	31585	Jersey	3	0.18	Negative			Negative						0.18	Negative
323	2	46103	Jersey	3	0.066	Negative			Negative						0.066	Negative
324	2	42914	Jersey	3	0.035	Negative			Negative				0.02	Negative	0.02	Negative
325	2	45957	Jersey	3	0.8	Positive	1	0	Negative				0.003	Negative	0.003	Negative
326	2	40655	Jersey	3	0.066	Negative			Negative				0.032	Negative	0.032	Negative
327	2	42896	Jersey	2	0.062	Negative			Negative						0.062	Negative
328	2	43342	Jersey	3	0.012	Negative			Negative						0.012	Negative
329	2	42578	Jersey	3	0.213	Negative			Negative						0.213	Negative
330	2	42065	Jersey	3	0.147	Negative			Negative						0.147	Negative
331	2	42993	Jersey	3	0.132	Negative			Negative						0.132	Negative
332	2	46556	Jersey	3	0.052	Negative			Negative						0.052	Negative
333	2	46087	Jersey	3	0.025	Negative			Negative				0.005	Negative	0.005	Negative
334	2	45831	Jersey	3	1.029	Positive	1	0	Negative				0.009	Negative	0.009	Negative
335	2	43681	Jersey	3	0.035	Negative			Negative				0.009	Negative	0.009	Negative
336	2	46720	Jersey	3	0.025	Negative			Negative						0.025	Negative
337	2	42748	Jersey	3	0.056	Negative			Negative						0.056	Negative
338	2	46069	Jersey	2	0.064	Negative			Negative						0.064	Negative
339	2	41166	Jersey	3	0.087	Negative			Negative						0.087	Negative
340	2	42947	Jersey	3	0.2	Negative			Negative						0.2	Negative
341	2	46118	Jersey	3	0.033	Negative			Negative						0.033	Negative
342	2	41607	Jersey	3	0.058	Negative			Negative						0.058	Negative
343	2	46306	Jersey	3	0.05	Negative			Negative						0.05	Negative
344	2	45074	Jersey	3	0.004	Negative			Negative						0.004	Negative
345	2	45868	Jersey	3	0.081	Negative			Negative						0.081	Negative
346	2	43264	Jersey	3	0.079	Negative			Negative						0.079	Negative
347	2	2850	Jersey	3	2.072	Positive	1	1.577	Positive						1.577	Positive
348	2	37548	Jersey	3	0.182	Negative			Negative						0.182	Negative
349	2	42976	Jersey	3	0.027	Negative			Negative						0.027	Negative
350	2	46148	Jersey	3	0.101	Negative			Negative						0.101	Negative
351	2	45154	Jersey	3	0.043	Negative			Negative						0.043	Negative
352	2	45205	Jersey	3	0.035	Negative			Negative						0.035	Negative
353	2	46228	Jersey	2	0.343	Negative			Negative						0.343	Negative
354	2	46384	Jersey	3	0.056	Negative			Negative						0.056	Negative
355	2	31191	Jersey	3	0.124	Negative			Negative						0.124	Negative
356	2	42412	Jersey	3	0.153	Negative			Negative						0.153	Negative
357	2	46331	Jersey	3	0.184	Negative			Negative						0.184	Negative
358	2	37132	Jersey	3	0.095	Negative			Negative						0.095	Negative
359	2	42884	Jersey	3	0.153	Negative			Negative						0.153	Negative
360	2	982000201048254	Jersey	3	0.262	Negative			Negative						0.262	Negative
361	2	41375	Jersey	3	0.136	Negative			Negative						0.136	Negative
362	2	42652	Jersey	2	0.143	Negative			Negative						0.143	Negative
363	2	37745	Jersey	3	0.157	Negative			Negative						0.157	Negative
364	2	44871	Jersey	3	0.12	Negative			Negative						0.12	Negative
365	2	35700	Jersey	3	0.058	Negative			Negative						0.058	Negative
366	2	46520	Jersey	3	0.052	Negative			Negative						0.052	Negative
367	2	43658	Jersey	3	0.112	Negative			Negative						0.112	Negative
368	2	43679	Jersey	3	0.395	Negative			Negative						0.395	Negative
369	2	41306	Jersey	3	0.03	Negative			Negative						0.03	Negative
370	2	42637	Jersey	3	0.094	Negative			Negative						0.094	Negative
371	2	46393	Jersey	3	0.024	Negative			Negative						0.024	Negative
372	2	45310	Jersey	3	0.304	Negative			Negative						0.304	Negative
373	2	45267	Jersey	3	0.068	Negative			Negative						0.068	Negative
374	2	46004	Jersey	3	0.068	Negative			Negative						0.068	Negative
375	2	3026	Jersey	3	0.059	Negative			Negative						0.059	Negative
376	2	45212	Jersey	3	0.059	Negative			Negative						0.059	Negative
377	2	41257	Jersey	2	0.052	Negative			Negative						0.052	Negative
378	2	43152	Jersey	3	0.097	Negative			Negative				0.028	Negative	0.028	Negative
379	2	40585	Jersey	3	2.161	Positive	1	0.006	Negative				0.015	Negative	0.015	Negative
380	2	22717	Jersey	3	0.042	Negative			Negative				0.009	Negative	0.009	Negative
381	2	45820	Jersey	3	0.049	Negative			Negative						0.049	Negative
382	2	45295	Jersey	3	0.085	Negative			Negative						0.085	Negative
383	2	44902	Jersey	3	0.085	Negative			Negative						0.085	Negative
384	2	46320	Jersey	3	0.097	Negative			Negative						0.097	Negative
385	2	46517	Jersey	3	0.106	Negative			Negative						0.106	Negative
386	2	6047	Jersey	3	0.113	Negative			Negative						0.113	Negative
387	2	22908	Jersey	3	0.155	Negative			Negative						0.155	Negative
388	2	39811	Jersey	3	0.38	Negative			Negative						0.38	Negative
389	2	43715	Jersey	3	0.056	Negative			Negative						0.056	Negative
390	2	18495	Jersey	3	0.135	Negative			Negative						0.135	Negative
391	2	45624	Jersey	3	0.071	Negative			Negative						0.071	Negative
392	2	39383	Jersey	3	0.04	Negative			Negative						0.04	Negative
393	2	46098	Jersey	3	0.021	Negative			Negative						0.021	Negative
394	2	38617	Jersey	3	0.372	Negative			Negative						0.372	Negative
395	2	43421	Jersey	3	0.049	Negative			Negative						0.049	Negative
396	2	44730	Jersey	3	0.042	Negative			Negative						0.042	Negative
397	2	45146	Jersey	3	0.031	Negative			Negative						0.031	Negative
398	2	45643	Jersey	3	0.069	Negative			Negative						0.069	Negative
399	2	41012	Jersey	2	0.247	Negative			Negative						0.247	Negative
400	2	40923	Jersey	3	0.026	Negative			Negative						0.026	Negative
401	2	40661	Jersey	3	0.054	Negative			Negative						0.054	Negative
402	2	46404	Jersey	3	0.08	Negative			Negative						0.08	Negative
403	2	43339	Jersey	3	0.031	Negative			Negative						0.031	Negative
404	2	42366	Jersey	3	0.076	Negative			Negative						0.076	Negative
405	2	45478	Jersey	3	0.182	Negative			Negative						0.182	Negative
406	2	43621	Jersey	2	0.319	Negative			Negative						0.319	Negative
407	2	2165	Jersey	3	0.872	Positive	1	0.64	Positive						0.64	Positive
408	2	40451	Jersey	3	0.071	Negative			Negative						0.071	Negative
409	2	40975	Jersey	2	0.023	Negative			Negative						0.023	Negative
410	2	41882	Jersey	3	0.342	Negative			Negative						0.342	Negative
411	2	44405	Jersey	3	0.057	Negative			Negative						0.057	Negative
412	2	2949	Jersey	3	0.208	Negative			Negative						0.208	Negative
413	2	41036	Jersey	3	0.066	Negative			Negative						0.066	Negative
414	2	41666	Jersey	3	0.299	Negative			Negative						0.299	Negative
415	2	45552	Jersey	3	0.106	Negative			Negative						0.106	Negative
416	2	42407	Jersey	3	0.024	Negative			Negative						0.024	Negative
417	2	46186	Jersey	3	0.066	Negative			Negative						0.066	Negative
418	2	44473	Jersey	3	0.042	Negative			Negative						0.042	Negative
419	2	36716	Jersey	3	0.069	Negative			Negative						0.069	Negative
420	2	19319	Jersey	3	0.123	Negative			Negative						0.123	Negative
421	2	43165	Jersey	3	1.149	Positive	1	1.061	Positive						1.061	Positive
422	2	46339	Jersey	3	0.069	Negative			Negative						0.069	Negative
423	2	41078	Jersey	3	0.17	Negative			Negative						0.17	Negative
424	2	43581	Jersey	3	0.08	Negative			Negative						0.08	Negative
425	2	46311	Jersey	3	0.002	Negative			Negative						0.002	Negative
426	2	40764	Jersey	3	0.307	Negative			Negative						0.307	Negative
427	2	45289	Jersey	3	0.057	Negative			Negative						0.057	Negative
428	2	21123	Jersey	3	0.118	Negative			Negative						0.118	Negative
429	2	43448	Jersey	3	0.116	Negative			Negative						0.116	Negative
430	2	38032	Jersey	3	0.101	Negative			Negative						0.101	Negative
431	2	42515	Jersey	3	0.043	Negative			Negative						0.043	Negative
432	2	21328	Jersey	3	0.767	Positive	1	0.829	Positive						0.829	Positive
433	2	23087	Jersey	3	0.059	Negative			Negative						0.059	Negative
434	2	43739	Jersey	2	0.102	Negative			Negative						0.102	Negative
435	2	45858	Jersey	3	0.108	Negative			Negative						0.108	Negative
436	2	6226	Jersey	3	1.345	Positive	1	0.918	Positive						0.918	Positive
437	2	41612	Jersey	3	0.089	Negative			Negative						0.089	Negative
438	2	45970	Jersey	3	0.247	Negative			Negative						0.247	Negative
439	2	38867	Jersey	3	0.071	Negative			Negative						0.071	Negative
440	2	46126	Jersey	2	0.045	Negative			Negative						0.045	Negative
441	2	41823	Jersey	3	0.014	Negative			Negative						0.014	Negative
442	2	19822	Jersey	3	1.757	Positive	1	1.562	Positive						1.562	Positive
443	2	19903	Jersey	3	1.644	Positive	1	2.04	Positive						2.04	Positive
444	2	39031	Jersey	3	0.535	Suspect			Negative	1	0.313	Negative	0.26	Negative	0.26	Negative
445	2	43135	Jersey	2	0.062	Negative			Negative						0.062	Negative
446	2	40553	Jersey	3	0.094	Negative			Negative						0.094	Negative
447	2	46565	Jersey	3	0.075	Negative			Negative						0.075	Negative
448	2	46289	Jersey	3	0.035	Negative			Negative						0.035	Negative
449	2	40316	Jersey	3	0.075	Negative			Negative						0.075	Negative
450	2	44780	Jersey	3	0.082	Negative			Negative						0.082	Negative
451	2	45638	Jersey	3	0.09	Negative			Negative						0.09	Negative
452	2	18341	Jersey	3	1.828	Positive	1	2.004	Positive						2.004	Positive
453	2	45942	Jersey	3	0.08	Negative			Negative						0.08	Negative
454	2	45976	Jersey	3	0.028	Negative			Negative						0.028	Negative
455	2	39791	Jersey	3	0.104	Negative			Negative						0.104	Negative
456	2	45728	Jersey	3	0.118	Negative			Negative						0.118	Negative
457	2	46212	Jersey	3	0.193	Negative			Negative						0.193	Negative
458	2	41043	Jersey	2	0.076	Negative			Negative						0.076	Negative
459	2	45602	Jersey	2	0.071	Negative			Negative						0.071	Negative
460	2	46456	Jersey	3	0.038	Negative			Negative						0.038	Negative
461	2	42851	Jersey	3	0.283	Negative			Negative						0.283	Negative
462	2	43359	Jersey	3	0.07	Negative			Negative						0.07	Negative
463	2	42913	Jersey	3	0.04	Negative			Negative						0.04	Negative
464	2	42852	Jersey	3	0.047	Negative			Negative						0.047	Negative
465	2	40849	Jersey	3	0.669	Positive	1	0.583	Positive						0.583	Positive
466	2	46149	Jersey	3	0.162	Negative			Negative						0.162	Negative
467	2	43301	Jersey	3	0.119	Negative			Negative						0.119	Negative
468	2	22806	Jersey	3	0.114	Negative			Negative						0.114	Negative
469	2	44761	Jersey	3	0.054	Negative			Negative						0.054	Negative
470	2	46604	Jersey	3	0.059	Negative			Negative						0.059	Negative
471	2	42169	Jersey	3	0.02	Negative			Negative						0.02	Negative
472	2	43255	Jersey	3	0.038	Negative			Negative						0.038	Negative
473	2	46685	Jersey	3	0.344	Negative			Negative						0.344	Negative
474	2	45148	Jersey	3	0.166	Negative			Negative						0.166	Negative
475	2	46395	Jersey	3	0.04	Negative			Negative						0.04	Negative
476	2	46524	Jersey	3	0.087	Negative			Negative						0.087	Negative
477	2	32955	Jersey	2	0.182	Negative			Negative						0.182	Negative
478	2	46265	Jersey	3	0.064	Negative			Negative						0.064	Negative
479	2	39075	Jersey	3	0.033	Negative			Negative						0.033	Negative
480	2	43556	Jersey	3	0.117	Negative			Negative						0.117	Negative
481	2	43045	Jersey	3	0.122	Negative			Negative						0.122	Negative
482	2	38969	Jersey	3	0.171	Negative			Negative						0.171	Negative
483	2	45981	Jersey	2	0.075	Negative			Negative						0.075	Negative
484	2	45380	Jersey	3	0.067	Negative			Negative						0.067	Negative
485	2	45769	Jersey	3	0.05	Negative			Negative						0.05	Negative
486	2	40239	Jersey	3	0.149	Negative			Negative						0.149	Negative
487	2	45919	Jersey	3	0.052	Negative			Negative						0.052	Negative
488	2	46514	Jersey	3	0.028	Negative			Negative						0.028	Negative
489	2	46094	Jersey	2	0.013	Negative			Negative						0.013	Negative
490	2	21784	Jersey	3	0.047	Negative			Negative						0.047	Negative
491	2	46510	Jersey	3	0.1	Negative			Negative						0.1	Negative
492	2	46416	Jersey	3	0.015	Negative			Negative						0.015	Negative
493	2	46201	Jersey	2	0.08	Negative			Negative						0.08	Negative
494	2	22280	Jersey	3	0.828	Positive	1	0.741	Positive						0.741	Positive
495	2	43052	Jersey	3	0.064	Negative			Negative						0.064	Negative
496	2	42894	Jersey	2	0.015	Negative			Negative						0.015	Negative
497	2	45888	Jersey	3	0.416	Negative			Negative						0.416	Negative
498	2	45736	Jersey	3	0.065	Negative			Negative						0.065	Negative
499	2	46161	Jersey	2	0.064	Negative			Negative						0.064	Negative
500	2	45503	Jersey	3	0.023	Negative			Negative						0.023	Negative
501	2	46122	Jersey	3	0.027	Negative			Negative						0.027	Negative
502	2	45194	Jersey	3	0.027	Negative			Negative						0.027	Negative
503	2	41515	Jersey	3	0.01	Negative			Negative						0.01	Negative
504	2	43262	Jersey	3	0.017	Negative			Negative						0.017	Negative
505	2	41207	Jersey	3	0.079	Negative			Negative						0.079	Negative
506	2	43357	Jersey	3	0.059	Negative			Negative						0.059	Negative
507	2	46073	Jersey	3	0.06	Negative			Negative						0.06	Negative
508	2	44302	Jersey	3	0.202	Negative			Negative						0.202	Negative
509	2	46346	Jersey	3	0.102	Negative			Negative						0.102	Negative
510	2	40983	Jersey	3	0.221	Negative			Negative						0.221	Negative
511	2	45987	Jersey	3	0.04	Negative			Negative						0.04	Negative
512	2	46115	Jersey	2	0.042	Negative			Negative						0.042	Negative
513	2	46219	Jersey	3	0.1	Negative			Negative						0.1	Negative
514	2	46314	Jersey	3	0.04	Negative			Negative						0.04	Negative
515	2	45785	Jersey	3	0.065	Negative			Negative						0.065	Negative
516	2	46246	Jersey	3	0.032	Negative			Negative						0.032	Negative
517	2	43304	Jersey	3	0.067	Negative			Negative						0.067	Negative
518	2	40071	Jersey	3	0.08	Negative			Negative						0.08	Negative
519	2	42981	Jersey	3	0.117	Negative			Negative						0.117	Negative
520	2	46310	Jersey	2	0.191	Negative			Negative						0.191	Negative
521	2	44642	Jersey	3	0.035	Negative			Negative						0.035	Negative
522	2	44245	Jersey	3	0.084	Negative			Negative						0.084	Negative
523	2	41330	Jersey	3	0.067	Negative			Negative						0.067	Negative
524	2	46644	Jersey	3	0.179	Negative			Negative						0.179	Negative
525	2	44770	Jersey	3	0.022	Negative			Negative						0.022	Negative
526	2	40456	Jersey	3	0.263	Negative			Negative						0.263	Negative
527	2	45717	Jersey	3	0.082	Negative			Negative						0.082	Negative
528	2	42779	Jersey	3	0.125	Negative			Negative						0.125	Negative
529	2	42056	Jersey	3	0.293	Negative			Negative						0.293	Negative
530	2	45024	Jersey	3	0.054	Negative			Negative						0.054	Negative
531	2	44702	Jersey	3	0.067	Negative			Negative						0.067	Negative
532	2	44373	Jersey	3	0.059	Negative			Negative						0.059	Negative
533	2	41204	Jersey	3	0.07	Negative			Negative						0.07	Negative
534	2	46429	Jersey	3	0.059	Negative			Negative						0.059	Negative
535	2	36505	Jersey	3	0.067	Negative			Negative						0.067	Negative
536	2	43244	Jersey	3	0.033	Negative			Negative						0.033	Negative
537	2	45547	Jersey	3	0.166	Negative			Negative						0.166	Negative
538	2	46090	Jersey	3	0.038	Negative			Negative						0.038	Negative
539	2	43978	Jersey	3	0.084	Negative			Negative						0.084	Negative
540	2	21719	Jersey	3	0.08	Negative			Negative						0.08	Negative
541	2	43248	Jersey	3	0.134	Negative			Negative						0.134	Negative
542	2	39197	Jersey	3	0.052	Negative			Negative						0.052	Negative
543	2	46158	Jersey	3	0.057	Negative			Negative						0.057	Negative
544	2	19939	Jersey	3	0.274	Negative			Negative						0.274	Negative
545	2	45343	Jersey	3	0.082	Negative			Negative						0.082	Negative
546	2	45529	Jersey	3	0.059	Negative			Negative						0.059	Negative
547	2	43519	Jersey	3	0.06	Negative			Negative						0.06	Negative
548	2	41374	Jersey	3	0.057	Negative			Negative						0.057	Negative
549	2	43941	Jersey	3	0.112	Negative			Negative						0.112	Negative
550	2	41748	Jersey	3	0.5	Suspect			Negative	1	0.342	Negative	0.272	Negative	0.272	Negative
551	2	32627	Jersey	3	0.105	Negative			Negative						0.105	Negative
552	2	40658	Jersey	3	0.057	Negative			Negative						0.057	Negative
553	2	45269	Jersey	3	0.038	Negative			Negative						0.038	Negative
554	2	42900	Jersey	3	0.062	Negative			Negative						0.062	Negative
555	2	43343	Jersey	3	0.072	Negative			Negative						0.072	Negative
556	2	46358	Jersey	3	0.05	Negative			Negative						0.05	Negative
557	2	43158	Jersey	3	0.07	Negative			Negative						0.07	Negative
558	2	43812	Jersey	3	0.055	Negative			Negative						0.055	Negative
559	2	42465	Jersey	3	0.082	Negative			Negative						0.082	Negative
560	2	19062	Jersey	3	0.514	Suspect			Negative	1	0.34	Negative	0.246	Negative	0.246	Negative
561	2	46440	Jersey	3	0.031	Negative			Negative						0.031	Negative
562	2	45463	Jersey	3	0.072	Negative			Negative						0.072	Negative
563	2	46041	Jersey	3	0.043	Negative			Negative						0.043	Negative
564	2	42516	Jersey	3	0.034	Negative			Negative						0.034	Negative
565	2	43201	Jersey	3	0.05	Negative			Negative						0.05	Negative
566	2	45394	Jersey	3	0.058	Negative			Negative						0.058	Negative
567	2	46231	Jersey	3	0.06	Negative			Negative						0.06	Negative
568	2	43088	Jersey	3	0.022	Negative			Negative						0.022	Negative
569	2	43666	Jersey	3	0.038	Negative			Negative						0.038	Negative
570	2	38853	Jersey	3	0.103	Negative			Negative						0.103	Negative
571	2	46125	Jersey	3	0.296	Negative			Negative						0.296	Negative
572	2	45468	Jersey	3	0.065	Negative			Negative						0.065	Negative
